1 **Fibroblast activation during decidualization: Embryo-derived TNF $\alpha$  induction of PGI<sub>2</sub>-PPAR $\delta$ -**  
2 **ACTIVIN A pathway through luminal epithelium**

3

4 **Running title:** Fibroblast activation during decidualization

5

6 Si-Ting Chen<sup>1,2</sup>, Wen-Wen Shi<sup>1</sup>, Yu-Qian Lin<sup>1</sup>, Zhen-Shang Yang<sup>1</sup>, Ying Wang<sup>1</sup>, Meng-Yuan Li<sup>1</sup>, Yue Li<sup>1</sup>,  
7 Ai-Xia Liu<sup>3</sup>, Yali Hu<sup>4\*</sup>, Zeng-Ming Yang<sup>1,2\*</sup>

8

9 <sup>1</sup>College of Animal Science, Guizhou University, Guiyang 550025, China

10 <sup>2</sup>College of Veterinary Medicine, South China Agricultural University, Guangzhou, 510642, China

11 <sup>3</sup>Department of Reproductive Endocrinology, Women's Hospital, Zhejiang University School of Medicine,  
12 1 Xueshi Road, Hangzhou, Zhejiang, 310006, PR China

13 <sup>4</sup>Department of Obstetrics and Gynecology, The Affiliated Drum Tower Hospital of Nanjing University  
14 Medical School, 321 Zhongshan Rd., Nanjing, 210008, China

15

16 \*Correspondence:

17 Yali Hu, MD, Department of Obstetrics and Gynecology, Affiliated Drum Tower Hospital, Medical School  
18 of Nanjing University, Nanjing 210008, China. E-mail: [yalihu@nju.edu.cn](mailto:yalihu@nju.edu.cn)

19 Zeng-Ming Yang, Ph.D., College of Animal Science, Guizhou University, Guiyang 550025, China. E-mail:  
20 [yangzm@gzu.edu.cn](mailto:yangzm@gzu.edu.cn)

21

22

23

24

25

26 **ABSTRACT**

27

28 **Objectives:** Human endometrium undergoes cyclical shedding and bleeding, scar-free repair and  
29 regeneration in subsequent cycles. Fibroblast activation has been shown to play a key role during normal  
30 tissue repair and scar formation. Abnormal fibroblast activation leads to fibrosis. Fibrosis is the main cause  
31 of intrauterine adhesion, uterine scarring, and thin endometrium. Endometrial decidualization is a critical  
32 step during early pregnancy. There are 75% of pregnancy failures pointed to decidualization defects.  
33 Because fibroblast activation and decidualization share similar markers, we assumed that fibroblast  
34 activation should be involved in decidualization.

35

36 **Materials and Methods:** Both pregnant and pseudopregnant ICR mice were used in this study.  
37 Immunofluorescence and immunohistochemistry were applied to examine fibroblast activation-related  
38 markers in mouse uteri. Western blotting was used to identify the impact on decidualization. Western blot  
39 and RT were used to show how arachidonic acid and its downstream product prostaglandin activate  
40 fibroblasts. Additionally, embryo-derived TNF $\alpha$  was shown to stimulate the secretion of arachidonic acid  
41 by immunofluorescence, western blot, and ELISA. The aborted decidual tissues with fetal trisomy 16 were  
42 compared with control tissues. GraphPad Prism5.0 Student's t test was used to compare differences between  
43 control and treatment groups

44

45 **Results:** Fibroblast activation-related markers are obviously detected in pregnant decidua and under in vitro  
46 decidualization. ACTIVIN A secreted under fibroblast activation promotes in vitro decidualization. We  
47 showed that arachidonic acid released from uterine luminal epithelium can induce fibroblast activation and  
48 decidualization through PGI<sub>2</sub> and its nuclear receptor PPAR- $\delta$ . Based on the significant difference of  
49 fibroblast activation-related markers between pregnant and pseudopregnant mice, we found that embryo-  
50 derived TNF $\alpha$  promotes cPLA<sub>2 $\alpha$</sub>  phosphorylation and arachidonic acid release from luminal epithelium.  
51 Fibroblast activation is also detected under human in vitro decidualization. Similar arachidonic acid-PGI<sub>2</sub>-

52 PPAR $\delta$ -ACTIVIN A pathway is conserved in human endometrium. Compared to controls, fibroblast  
53 activation is obviously compromised in human decidual tissues with fetal trisomy 16.

54

55 **Conclusions:** Embryo-derived TNF $\alpha$  promotes cPLA<sub>2 $\alpha$</sub>  phosphorylation and arachidonic acid release from  
56 luminal epithelium to induce fibroblast activation and decidualization.

57

58 **Keywords:** Fibroblast activation; Arachidonic acid; ACTIVIN A; Decidualization

59

60

61 **Graphic abstract**

62

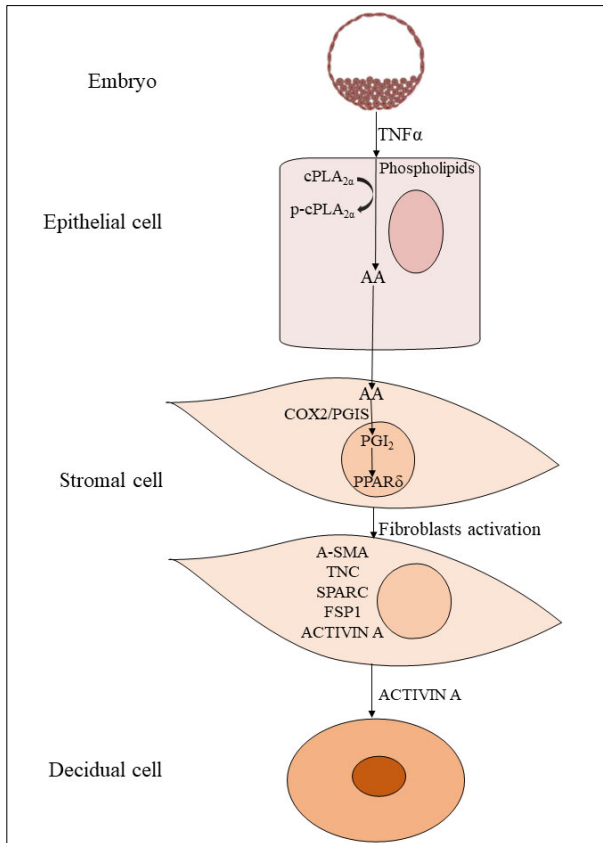

63

64

65

66

## 67 1. INTRODUCTION

68 Fibroblasts are the most numerous cells in connective tissue. Fibroblast activation refers to the process in  
69 which dormant quiescent fibroblasts in tissues are stimulated to form functionally related fibroblasts and  
70 perform different functions. Fibroblasts synthesize the extracellular matrix (ECM) of connective tissue and  
71 play a key role in maintaining the structural integrity of most tissues [1-3]. In healthy and intact tissues,  
72 fibroblasts remain a dormant and non-proliferating state. Upon stimulation, dormant fibroblasts acquire  
73 contractile properties by inducing the formation of stress fibers, resulting in the formation of myofibroblasts  
74 [4; 5]. The myofibroblast is a specialized fibroblast expressing  $\alpha$ -smooth muscle actin ( $\alpha$ -SMA)[6].  $\alpha$ -SMA  
75 is also a marker of cancer-associated fibroblasts (CAFs) [7]. In tumor tissues, activated stromal fibroblasts  
76 are called as cancer-associated fibroblasts (CAFs) and show similar characteristics with myofibroblasts  
77 [8]. Under the stimulation of cytokines and growth factors, fibroblasts will transform into myofibroblasts  
78 at the initial stage and further differentiate to into functionally fibroblasts. Activated fibroblasts are  
79 characterized by expressing  $\alpha$ -SMA, FAP, Vimentin, Desmin, FSP1, Tenascin C(TNC), periostin (POSTN),  
80 and SPARC [9].

81  
82 In adult tissues, the human endometrium undergoes cyclical shedding and bleeding, scar-free repair and  
83 regeneration in subsequent cycles[10; 11]. Activation of fibroblasts plays a key role during normal tissue  
84 repair and scar formation [12]. In the uterus, the mesenchyme accounts for about 30-35%, the luminal  
85 epithelium and glandular epithelium about 5-10%, and the myometrium about 60-65% of the main uterine  
86 cell types. Six cell types have been identified in human endometrium, including stromal fibroblasts,  
87 endothelial cells, macrophages, uNK, lymphocytes, epithelial cells, and smooth muscle cells [13]. Based  
88 on a recent single-cell transcriptomic analysis of human endometrium, stromal cells were the most abundant  
89 cell type in the endometrium [14]. The fertilized egg divides in the fallopian tube to form morula, forming  
90 early blastocyst on the fourth day of gestation and entering the uterus [15]. As the blastocyst begins to  
91 adhere onto the uterus on day 4 of pregnancy, the activated embryo secretes a series of factors to remodel  
92 the stationary fibroblasts through epithelial cells [16]. Endometrial stromal fibroblasts undergo

93 decidualization to form specialized secretory decidual cells, followed by the increase of uterine  
94 permeability and immune factors [17]. Decidualization is characterized by significant proliferation,  
95 differentiation, and endoreduplication (polyploidy) of endometrial stromal cells near the site of embryo  
96 implantation [18]. In mice, decidualization occurs only after the onset of implantation. However,  
97 decidualization can also be induced by artificial stimuli [19]. In contrast to mice, human decidualization  
98 does not require embryo implantation and is driven by postovulatory progesterone and cAMP [17].

99

100 During primate decidualization,  $\alpha$ SMA increases at the initial stage and decreases at the final differentiation  
101 stage [20].  $\alpha$ SMA is also strongly expressed in rat decidual cells [21].  $\alpha$ SMA expression in interstitial  
102 fibroblasts during pregnancy correlates with the onset of the decidual process [22]. Meanwhile,  $\alpha$ SMA is  
103 strongly expressed in myofibroblast and often recognized as the marker of fibroblast activation [6; 23].  
104 ATP, uric acid and HMGB1 belong to damage associated molecular patterns (DAMPs), which are released  
105 following tissue injury or cell death [24]. During the inflammatory phase, the release of these DAMP  
106 molecules is able to stimulate the conversion of fibroblasts to  $\alpha$ SMA-expressing myofibroblasts [25]. We  
107 recently demonstrated that secreted ATP or uric acid under artificial decidualization can induce mouse  
108 decidualization [26; 27]. It has been shown that ATP or uric acid can also stimulate fibroblast activation  
109 [28; 29]. These studies strongly suggest that there is a similarity between fibroblast activation and  
110 decidualization, and fibroblast activation may play an important role during decidualization. Fibrosis is  
111 caused by excessive fibroblast activation and the buildup of extracellular matrix and matrix  
112 metalloproteinase elements in specific tissues [30]. Endometrial fibrosis is the most common cause of  
113 uterine infertility, including implantation failure, and miscarriage [31; 32]. However, whether there is  
114 fibrosis during embryo implantation and decidualization and its underlying mechanism are still unclear.

115

116 Arachidonic acid (AA) is the biosynthetic precursor of prostaglandins in the cell membrane. cPLA<sub>2 $\alpha$</sub>  is  
117 encoded by the *Pla2g4a* gene and a major provider of arachidonic acid. *Pla2g4a* knockout mice show

118 uneven embryo distribution and reduced litter size, suggesting that maternal uterine cPLA<sub>2α</sub> is critical for  
119 successful embryo implantation [33]. Cyclooxygenase COX is the rate-limiting enzyme for prostaglandin  
120 synthesis. COX-1 knockout mice are fertile, with only birth defects [34]. COX-2 knockout on  
121 C57BL/6J/129 background mice results in impaired implantation, and decidualization, indicating the  
122 important role of COX-2 during embryo implantation and decidualization [34]. PGI<sub>2</sub> and PGE<sub>2</sub> are the two  
123 most abundant prostaglandins at the embryo implantation site [35]. PGI<sub>2</sub> derived from COX-2 can regulate  
124 embryo implantation through PPAR-δ [35]. Both embryonic implantation and decidualization are abnormal  
125 in CD1 PPAR-δ<sup>-/-</sup> mice [36]. However, whether prostaglandins are involved in fibroblast activation during  
126 early pregnancy remains unclear.

127

128 In this study, our hypothesis was whether fibroblast activation is involved in mouse and human  
129 decidualization. The multiple markers of fibroblast activation were detected during mouse in vivo and in  
130 vitro decidualization. Embryos-derived TNFα was able to induce the phosphorylation of cPLA<sub>2α</sub> in luminal  
131 epithelium, which liberated arachidonic acid into uterine stroma to promote fibroblast activation through  
132 COX2-PGI<sub>2</sub>-PPARδ pathway for inducing decidualization. The underlying mechanism of fibroblast  
133 activation was also conserved during human in vitro decidualization. This study offers novel insights into  
134 the function of fibroblasts during embryo implantation and decidualization as well as novel approaches to  
135 the study of early normal pregnancy and human illnesses.

136

## 137 **2. MATERIALS AND METHODS**

138

### 139 **2.1. Animals and treatments**

140 Mature CD1 mice (6 weeks of age) was purchased from Hunan Slaike Jingda Laboratory Animal Co., LTD  
141 and maintained in specific pathogen free (SPF) environment and controlled photoperiod (light for 12 h and  
142 darkness for 12 h). All animal protocols were approved by the Animal Care and Use Committee of South

143 China Agricultural University. In order to induce pregnancy or pseudopregnancy, female mice aged 8-10  
144 weeks were mated with male mice of reproductive age or vasectomized mice (vaginal plug day for day 1).  
145 To confirmed the pregnancy of female mice, embryos were flushed from fallopian tubes or uteri from days  
146 1 to 4. On days 4 midnight, 5 and 5 midnight, implantation sites were identified by intravenous injection of  
147 0.1 ml of 1% Chicago blue dye (Sigma-Aldrich, St. Louis, MO) dissolved in saline.

148  
149 On day 4 of pregnancy (0800-0900 h), pregnant mice were ovariectomized to induce delayed implantation.  
150 From days 5 to 7, progesterone was injected daily (1 mg/0.1 ml sesame oil/mice, Sigma-Aldrich) to  
151 maintain delayed implantation. Estradiol-17 $\beta$  (1  $\mu$ g/ml sesame oil/mouse, MCE) was subcutaneously  
152 injected on day 7 to activate embryo implantation. Delayed implantation was confirmed by flushing the  
153 blastocyst from the uterine horn. The implantation site of the activated uterus was determined by  
154 intravenous injection of Chicago blue dye.

155

## 156 **2.2. Transfer of TNF $\alpha$ -soaked beads**

157 Affi-Gel Blue Gel Beads (Bio-Rad # 1537302) with blastocyst size were incubated with TNF $\alpha$  (0.1%  
158 BSA/PBS (410-MT-010, R&D systems, Minnesota, USA) 37°C for 4 h. After washed with M2 (0.1% BSA)  
159 for three times, TNF $\alpha$ -soaked beads (15 beads/horn) were transplanted into the uterine horn of day 4  
160 pseudopregnant mice. Beads incubated in 0.1% BSA/PBS were used as control group. Blue bands with  
161 beads were identified by injecting Chicago blue into the tail intravenous injection of Chicago blue to  
162 observe the implantation site 3 and 24 h after transplantation, respectively.

163

## 164 **2.3. Immunofluorescence**

165 Immunofluorescence was performed as described previously [37; 38]. Briefly, frozen sections (10  $\mu$ m) were  
166 fixed in 4% paraformaldehyde (158127, Sigma Aldrich, St. Louis, MO) for 10 min. Frozen or paraffin  
167 sections were blocked with 10% horse serum for 1 h at 37 °C and incubated overnight with appropriate



168 dilutions of primary antibodies at 4°C. The primary antibodies used in this study included anti- $\alpha$ -SMA  
169 (19245T, Cells Signaling Technology, Danvers, MA), anti-SPARC (8725S, Cells Signaling Technology),  
170 anti-FSP1 (13018S, Cells Signaling Technology), anti-POSTN (SAB2101847, Sigma-Aldrich), anti-P-  
171 CPLA<sub>2 $\alpha$</sub>  (2831S, Cells Signaling Technology). After washing in PBS, sections were incubated with  
172 secondary antibody (Jackson ImmunoResearch, West Grove, PA) for 40 min, counterstained with 4, 6-  
173 diamidino-2-phenylindole dihydrochloride (DAPI, D9542, Sigma-Aldrich) or propidium iodide (PI) and  
174 were mounted with ProLong™ Diamond Antifade Mountant (Thermo Fisher, Waltham, MA). The pictures  
175 were captured by laser scanning confocal microscopy (Leica, Germany).

176

#### 177 **2.4. Immunohistochemistry**

178 Immunohistochemistry was performed as described previously [39]. In short, paraffin sections (5  $\mu$ m) were  
179 deparaffined, rehydrated, and antigen retrieved by boiling in 10 mM citrate buffer for 10 min. Endogenous  
180 horseradish peroxidase (HRP) activity was inhibited with 3% H<sub>2</sub>O<sub>2</sub> solution in methanol. After washing for  
181 three times with PBS, the sections were incubated at 37°C for 1 h in 10% horse serum for blocking,  
182 incubated overnight in each primary antibody at 4°C. The primary antibodies used in this study included  
183 anti- $\alpha$ -SMA, anti-TNC (ab108930, Abcam, Cambridge, UK), anti-FSP1, and anti-POSTN. After washing,  
184 the sections were incubated with biotinylated rabbit anti-goat IgG antibody (Zhongshan Golden Bridge,  
185 Beijing, China) and streptavidin-HRP complex (Zhongshan Golden Bridge). According to the  
186 manufacturer's protocol, the positive signals were visualized using DAB Horseradish Peroxidase Color  
187 Development Kit (Zhongshan Golden Bridge). The nuclei were counter-stained with hematoxylin.

188

#### 189 **2.5. siRNA transfection**

190 The siRNAs for mouse Activin a were designed and synthesized by Ribobio Co., Ltd. (Guangzhou, China).  
191 Following manufacturer's protocol, cells were transfected with each *Inhba* siRNA using Lipofectamine  
192 2000 Transfection Reagent (Invitrogen, Grand Island, NY) for 6 h. The siRNA sequences were listed in  
193 Table 1.

194

## 195 **2.6. Arachidonic acid assay**

196 The arachidonic acid ELISA kit was used to detect arachidonic acid in the supernatant according to the  
197 manufacturer's instructions (Elabscience, E-EL-0051c, Wuhan, China). This kit's sensitivity is greater than  
198 0.94ng/ml. In brief, 50  $\mu$ l of each sample was incubated at 37°C for 45 minutes with 50  $\mu$ l of biotinylated  
199 antibody working solution, 100  $\mu$ L of HRP enzyme conjugate working solution for 30 minutes, and 90  $\mu$ L  
200 of substrate solution for 15 minutes before being stopped with 50  $\mu$ L of substrate solution. The solution  
201 was immediately read at 450 nm with a Biotek microplate reader (ELX808). Absorbance values for  
202 arachidonic acid standards were calculated in the same way. The arachidonic acid standard curve was used  
203 to calculate the concentrations of arachidonic acid.

204

## 205 **2.7. Isolation and treatment of mouse uterine luminal epithelial cells**

206 Uterine luminal epithelial cells were isolated as previously described [40]. The uteri from the estrous mice  
207 or day 4 of pseudopregnancy were cut longitudinally, washed in HBSS, incubated in 0.2% (W/V) trypsin  
208 (0458, Amresco, Cleveland, USA) and 6 mg/ml dispase (Roche Applied Science ,4942078001, Basel,  
209 Switzerland) in 4.3 mL HBSS for 1.5 h at 4°C, 30 min at room temperature, and 10 min at 37°C. After  
210 rinsing in HBSS, the epithelial cells were precipitated in 5% BSA in HBSS for 7 min. After the collected  
211 epithelial cells were cultured in DMEM/F12 (D2906, Sigma-Aldrich) with 10% FBS in a culture plate for  
212 30 min, the unattached epithelial cells were transferred into new culture plates for further culture. Luminal  
213 epithelial cells were treated with TNF $\alpha$  (410-MT-010, R&D systems) in DMEM/F12 with 2% charcoal-  
214 treated FBS (cFBS, Biological Industries, Cromwell, CT).

215

## 216 **2.8. Isolation and treatment of mouse endometrial stromal cells**

217 Mouse endometrial stromal cells were isolated as previously described [38]. Briefly, mouse uteri on day 4  
218 of pseudopregnancy were cut longitudinally, washed in HBSS, and incubated with 1% (W/V) trypsin and

219 6 mg/ml dispase in 3.5 mL HBSS for 1 h at 4 °C, for 1h at room temperature and for 10 min at 37°C. The  
220 uterine tissues were washed with Hanks' balanced salt solution, incubated in 6 ml of HBSS containing 0.15  
221 mg/ml Collagenase I (Invitrogen, 17100-017) at 37°C for 35 min. Primary endometrial stromal cells were  
222 cultured with DMEM/F12 containing 10% heat-inactivated fetal bovine serum (FBS).

223  
224 Mouse in vitro decidualization was performed as previously described [41]. Primary endometrial stromal  
225 cells were treated with 10 nM of Estradiol-17  $\beta$  and 1  $\mu$ M of P4 in DMEM/F12 containing 2% charcoal-  
226 treated FBS (cFBS, Biological Industries) to induce decidualization in vitro for 72 h. Stromal cells were  
227 treated with TNC(3358-TC-050, R & D systems), FSP1(HY-P71084, MedChemExpress, NJ, USA),  
228 arachidonic acid (A3611, Sigma-Aldrich), PGI analogue ILOPROST (HY-A0096, MedChemExpress),  
229 PPAR- $\delta$  agonist GW501516 (317318-70-0, Cayman Chemical), COX-2 antagonist NS 398(S8433, Selleck,  
230 Shanghai, China), PPAR- $\delta$  antagonist GSK0660 (1014691-61-2, Selleck), and ACTIVIN A (HY-P70311,  
231 MedChemExpress) in DMEM/F12 containing 2% carbonate-treated FBS, respectively.

232

### 233 **2.9. Culture and treatment of human cell lines**

234 Ishikawa endometrial adenocarcinoma cells line (Chinese Academy of Science, Shanghai, China) and  
235 human endometrial stromal cell 4003 (ATCC, CRL-4003) (American Type Culture Collection) were  
236 cultured in DMEM/F12 with 10% FBS, and supplemented with 100 units/ml penicillin and 0.1 mg/ml  
237 streptomycin (PB180429, Procell, Wuhan, China) at 37°C, 5% CO<sub>2</sub>. TNF $\alpha$  was used to treat Ishikawa cells.

238

### 239 **2.10. Co-culture of epithelial cells and stromal cells**

240 The uterine luminal epithelial cells isolated from mouse uteri on day 4 of pseudopregnancy were cultured  
241 to confluence on coverglasses. The endometrial stromal cells isolated from mouse uteri on day 4  
242 pseudopregnancy were cultured in a culture plate with four plastic pillars. Then the coverglasses with  
243 epithelial cells were transferred onto the four plastic pillars of culture plates with stromal cells for further

244 culture and treatments. The co-culture of human ISHIKAWA cells with human stromal 4003 cells was  
245 performed as in mice.

246

### 247 **2.11. Western blot**

248 Western blot was performed as previously described [37]. The primary antibodies used in this study  
249 included phosphorylated CPLA<sub>2α</sub> (SC-438, Santa Cruz Biotechnology), CPLA<sub>2α</sub>, TNC, SPARC (8725S,  
250 Cells Signaling Technology), α-SMA, COX-2 (12282T, Cells Signaling Technology), PGIS (100023,  
251 Cayman Chemical), PPARδ (ab178866, Abcam), BMP2 (A0231, Abclonal, Wuhan, China), WNT4 (sc-  
252 376279, Santa Cruz Biotechnology, Dallas, TX), E2F8 (A1135, Abclonal), CYCLIN D3 (2936T, Cells  
253 Signaling Technology), TUBULIN (2144S, Cells Signaling Technology), GAPDH (sc-32233, Santa Cruz  
254 Biotechnology). After the membranes were incubated with an HRP-conjugated secondary antibody (1:5000,  
255 Invitrogen) for 1 h, the signals were detected with an ECL Chemiluminescent Kit (Millipore, USA).

256

### 257 **2.12. Real-time RT-PCR**

258 The total RNA was isolated using the Trizol Reagent Kit (9109, Takara, Japan), digested with RQ1  
259 deoxyribonuclease I (Promega, Fitchburg, WI), and reverse-transcribed into cDNA with the Prime Script  
260 Reverse Transcriptase Reagent Kit (Takara, Japan). For real-time PCR, the cDNA was amplified using a  
261 SYBR Premix Ex Taq Kit (TaKaRa) on the CFX96 Touch™ Real-Time System (Bio-Rad). For real-time  
262 PCR System (Bio-Rad). Data were analyzed using the 2- $\Delta\Delta$ Ct method and normalized to *Rpl7* (mouse)  
263 or *RPL7* (human) level. The corresponding primer sequences of each gene were provided in Table 1.

264

### 265 **2.13. Collection of human decidual tissues with fetal trisomy 16**

266 Endometrial decidual tissues were taken from women between the ages of 31 and 38 who underwent  
267 voluntary pregnancy termination (8-10 weeks gestation) at Hangzhou Women's Hospital and Drum Tower  
268 Hospital affiliated with Nanjing University School of Medicine in China. To diagnose aneuploidy,

269 chromosomal microarray (CMA) was used to test the fetal tissues of patients. In this study, decidual tissues  
270 were collected after fetal tissues were identified as trisomy 16. The decidual tissues were collected from  
271 women who decided to terminate their pregnancy due to an unplanned pregnancy. For further examination,  
272 all samples were rinsed with saline to eliminate excess blood, fixed in 10% PBS-buffered formalin, and  
273 embedded in paraffin. The informed consents were obtained from all the patients prior to the collection of  
274 samples. This study was approved by The Ethics Committee of Zhejiang University School of Medicine's  
275 Obstetrics and Gynecology Hospital and the Human Research Committee of Nanjing Drum Tower Hospital,  
276 respectively.

277

#### 278 **2.14. Statistical analysis**

279 The data were analyzed by GraphPad Prism5.0 Student's T test was used to compare differences between  
280 two groups. The comparison among multiple groups was performed by ANOVA test. All the experiments  
281 were repeated independently at least three times. In the mouse study, each group had at least three mice.  
282 Data were presented as mean  $\pm$  standard deviation (SD). A value of  $p < 0.05$  was considered significant.

283

### 284 **3. RESULTS**

285

#### 286 **3.1. Fibroblast activation is present during mouse early pregnancy**

287 Alpha SMA, SPARC, FSP1, TNC, and SPARC are well recognized markers of fibroblast activation [9; 42].  
288 Immunofluorescence and immunohistochemistry showed that TNC, SPARC, and FSP1 were mainly  
289 localized in the primary decidual region after embryo implantation. SPARC immunofluorescence was  
290 strongly observed in subluminal stromal cells from day 4 midnight to day 5 midnight of pregnancy.  
291 However, TNC immunostaining was strongly detected in subluminal stromal cells on day 4 morning, day  
292 4 midnight and day 5 of pregnancy, but disappeared on D5 midnight. FSP1 immunostaining wasn't detected  
293 in mouse uterus on day 4 morning and day 4 midnight of pregnancy, but detected in subluminal stromal  
294 cells at implantation sites on day 5 morning and day 5 midnight of pregnancy (Fig. 1A). Under in vitro

295 decidualization, the protein levels of  $\alpha$ SMA, TNC and SPARC were significantly increased compared with  
 296 the control group (Fig. 1B-source data-1). These results suggested that fibroblast activation should be  
 297 present under in vivo and in vitro decidualization.

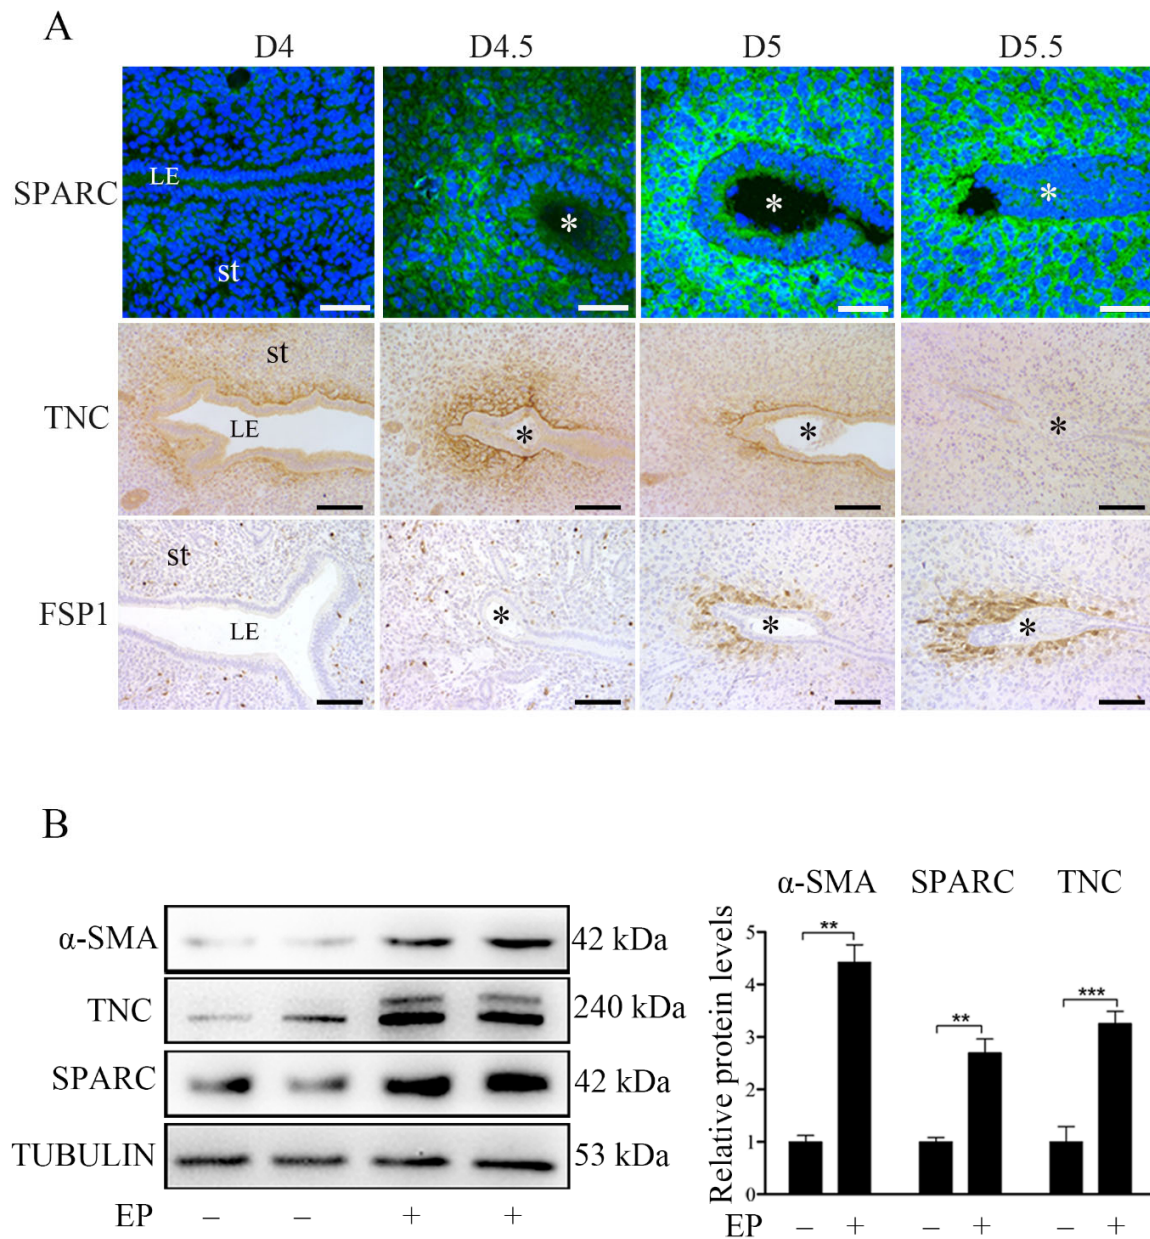

298

299 **Fig. 1. The protein localization and levels of markers of fibroblast activation in mouse uteri during**

300 **early pregnancy. (A) Immunofluorescence of SPARC and POSTN, and immunohistochemistry of**

301 TNC and FSP1 in mouse uteri on day 4 0900 (D4, n=5), day 4 24:00 (D4.5, n=5), day 5 0900 (D5,  
302 n=5), and day 5 2200 (D5.5, n=5) of pregnancy. Three mice are used in each group. LE, luminal  
303 epithelium; St, stroma; \* Embryo. Scale bar, 50  $\mu$ m. **(B)** Western blot analysis of  $\alpha$ -SMA, SPARC,  
304 TNC protein level under in vitro decidualization (EP) for 24 h. \*,  $p < 0.05$ ; \*\*,  $p < 0.01$ ; \*\*\*,  $p <$   
305 0.001.

306

### 307 **3.2. Fibroblasts activation promotes decidualization by secreting ACTIVIN A**

308 BMP2 and WNT4 are essential to mouse decidualization [43; 44]. E2F8 and CYCLIN D3 are markers of  
309 polyploidy during mouse decidualization [45]. It has been shown that activated fibroblasts can secrete FSP1,  
310 SPARC, TNC, and ACTIVIN A [9; 46]. In order to examine whether fibroblast activation is involved in  
311 mouse decidualization, mouse stromal cells were treated with FSP1, SPARC, TNC, and ACTIVIN A to  
312 induce in vitro decidualization, respectively. TNC treatment upregulated the protein levels of WNT4 and  
313 CYCLIN D3, but had no obvious effects on BMP2 and E2F8 (Fig. 2A-source data-1). FSP1 treatment  
314 significantly increased BMP2 and WNT4 protein levels, but had no obvious effects on E2F8 and CYCLIN  
315 D3 (Fig. 2B-source data-2). SPARC overexpression in mouse stromal cells also upregulated BMP2 and  
316 CYCLIN D3 protein levels, but had no significant effect on WNT4 and E2F8 (Fig. 2C-source data-3).  
317 Because ACTIVIN A is secreted under fibroblast activation [47], we examined ACTIVIN A protein levels  
318 in the uteri on D4 09:00 and 24:00 of pregnancy and pseudopregnant mice, respectively. The protein levels  
319 of ACTIVIN A on D4 09:00 and 24:00 of pregnancy were significantly higher than that in pseudopregnant  
320 mice. The protein level of ACTIVIN A on day 4 24:00 was significantly higher than that on day 4 09:00  
321 (Fig. 2D-source data-4), indicating that the secretion of ACTIVIN A increased after embryo implantation.  
322 After mouse stromal cells were treated with ACTIVIN A, all the protein levels of BMP2, WNT4, E2F8,  
323 and CYCLIN D3 were obviously up-regulated (Fig. 2E-source data-5). Under in vitro decidualization,  
324 ACTIVIN A treatment also significantly increased all the protein levels of BMP2, WNT4, E2F8, and

325 CYCLIN D3 (Fig. 2F-source data-6). These results suggest a positive correlation between ACTIVIN A  
326 and decidualization.



A

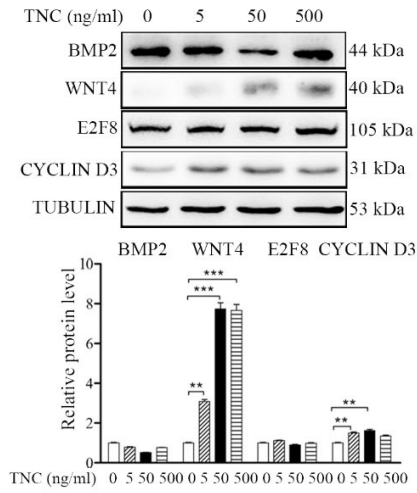

B

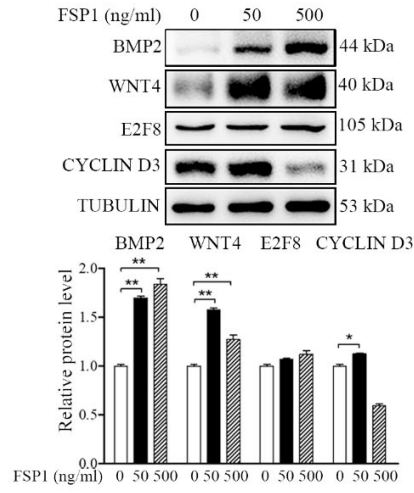

C

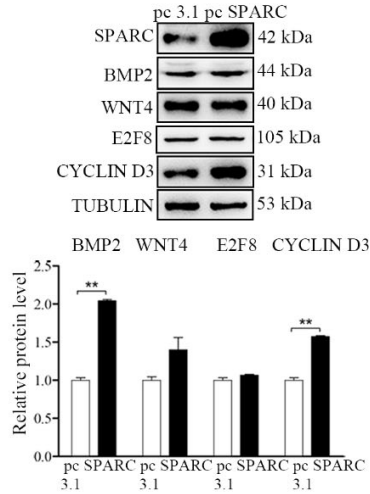

D

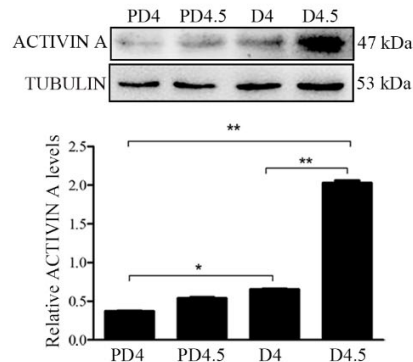

E

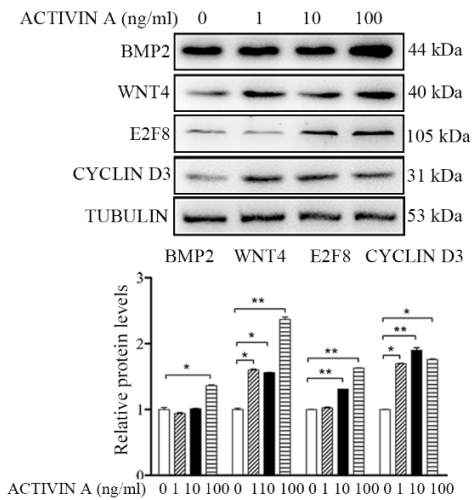

F

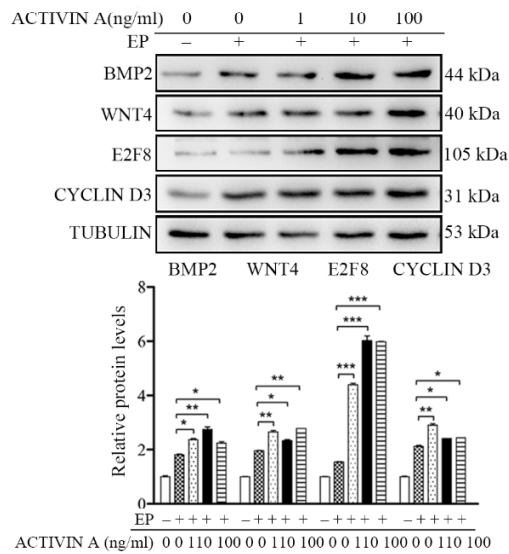

328 **Fig. 2. Fibroblasts activation promotes decidualization by secreting ACTIVIN A.** (A) Western blot  
329 analysis on the effects of TNC on decidualization markers (BMP2, WNT4, E2F8 and CYCLIN D3)  
330 after stromal cells were treatment with TNC for 72 h. (B) Western blot analysis of the effects of  
331 FSP1 on decidualization markers after stromal cells were treated with FSP1 for 72 h. (C) Western  
332 blot analysis on the effects of *Sparc* overexpression on decidualization markers after  
333 overexpression of *Sparc* gene in cultured stromal cells. (D) Western blot analysis on ACTIVIN A  
334 protein levels in mouse uteri on day 4 0900 and day 4 2400 of pregnancy and pseudopregnancy,  
335 respectively. (E) Western blot analysis on the effects of ACTIVIN A on decidualization markers  
336 after stromal cells were treated with ACTIVIN A for 72 h. (F) Western blot analysis on the effects  
337 of ACTIVIN A on decidualization markers after stromal cells were treated with ACTIVIN A for  
338 48 h under in vitro decidualization. All data were is presented as means  $\pm$  SD.

339

### 340 **3.3. PGI<sub>2</sub> promotes fibroblast activation and decidualization through PPAR- $\delta$ pathway.**

341 Although we just showed the presence of fibroblast activation during decidualization, what initiates  
342 fibroblast activation is still unknown. A previous study indicated that PGE<sub>2</sub> and PGI<sub>2</sub> are the most abundant  
343 prostaglandins at implantation sites in mouse uterus [35]. Both PGE<sub>2</sub> and PGI<sub>2</sub> are essential to mouse  
344 decidualization [35; 48]. When mouse stromal cells were treated with PGE<sub>2</sub>, PGE<sub>2</sub> had no obvious effects  
345 on the protein levels of TNC,  $\alpha$ SMA and SPARC (Fig. 3A-source data-1). However, ILOPROST, a PGI<sub>2</sub>  
346 analog, significantly up-regulated the protein levels of TNC,  $\alpha$ SMA and SPARC. Peroxisome proliferator-  
347 activated receptor  $\delta$  (PPAR $\delta$ ), the PGI<sub>2</sub> nuclear receptor, was also significantly increased by ILOPROST  
348 (Fig. 3B-source data-2). Further analysis showed that PPAR- $\delta$  agonist GW501516 was also able to  
349 upregulate the protein levels of TNC,  $\alpha$ SMA and SPARC (Fig. 3C-source data-3). After stromal cells were  
350 treated with either ILOPROST or GW501516, decidualization markers (BMP2, WNT4, E2F8 and CYCLIN  
351 D3) were also significantly up-regulated (Fig. 3D-source data-4, E-source data-5). ILOPROST treatment

352 also obviously upregulated the protein level of ACTIVIN A (Fig. 3F-source data-6). These results showed  
 353 that PGI<sub>2</sub> initiated fibroblast activation and promoted decidualization through the PPAR- $\delta$  pathway.

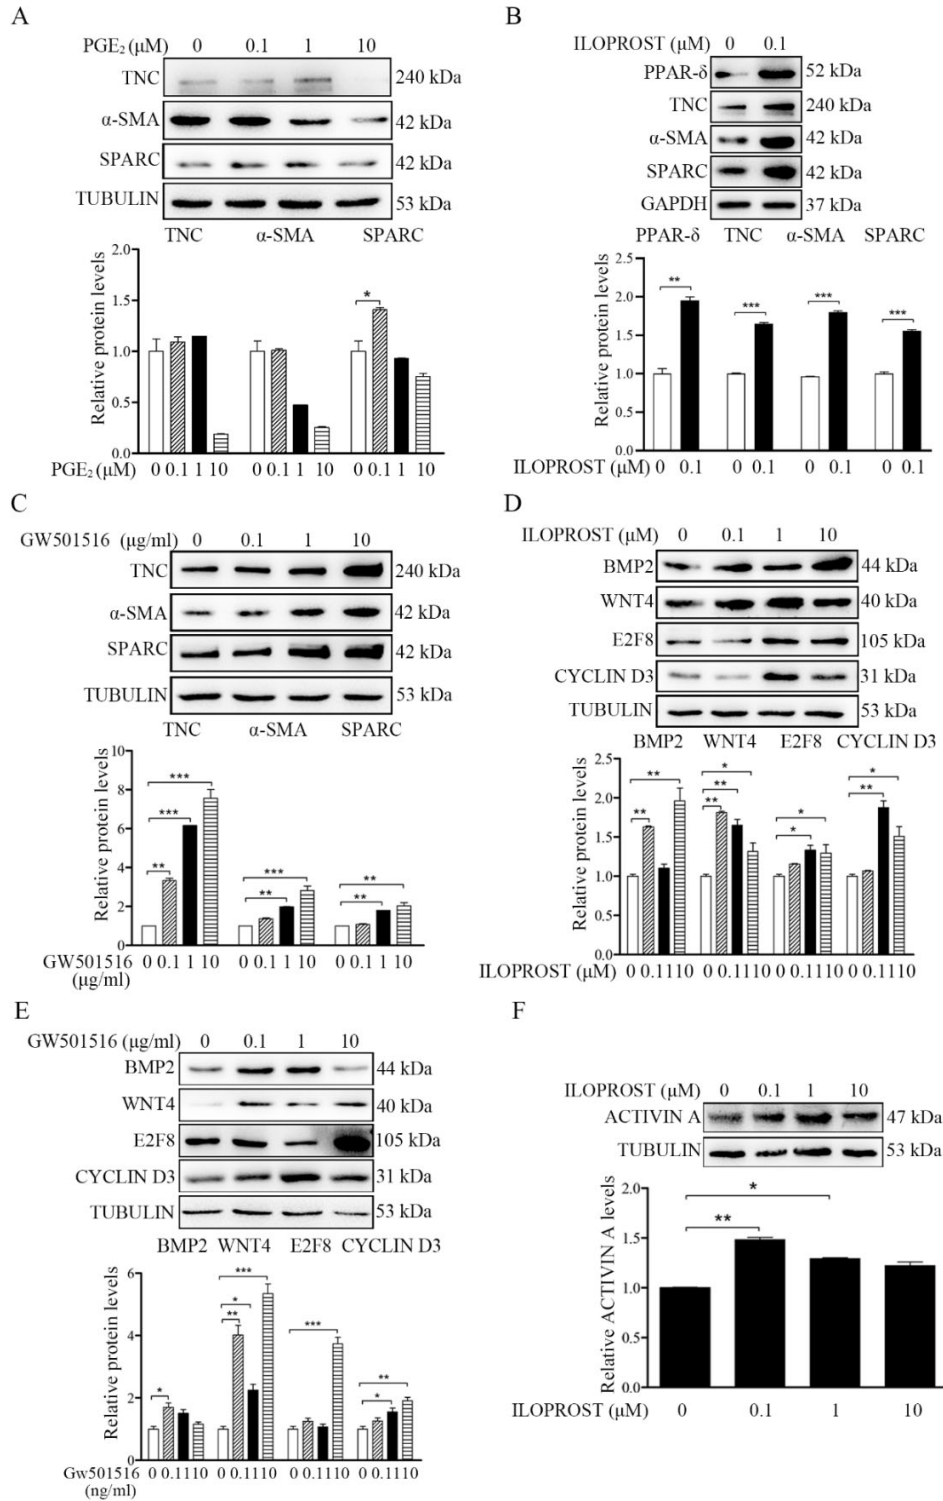

354

355 **Fig. 3. Western blot analysis on effects of prostaglandins on fibroblast activation and decidualization**  
356 **in mouse stromal cells.** (A) The effects of PGE<sub>2</sub> on markers of fibroblast activation. (B) The effects  
357 of ILOPROST, PGI<sub>2</sub> analog, on markers of fibroblast activation after stromal cells was treated with  
358 PGI<sub>2</sub> for 12 h. (C) The effects of GW501516, PPAR $\delta$  agonist, on markers of fibroblast activation.  
359 (D) The effects of ILOPROST on decidualization markers. (E) The effects of GW501516 on  
360 decidualization markers. (F) The effects of ILOPROST on ACTIVIN A protein levels after stromal  
361 cells were treated with ILOPROST for 24 h.

362

363 **3.4. Arachidonic acid induces the fibroblasts activation and promotes decidualization through**  
364 **stimulating Activin A secretion**

365 Arachidonic acid is the precursor of prostaglandin biosynthesis and can be liberated from membrane lipids  
366 through the phosphorylation of cPLA<sub>2 $\alpha$</sub>  [49]. cPLA<sub>2 $\alpha$</sub>  is significantly expressed in the luminal epithelium in  
367 mouse uterus during peri-implantation period and essential for mouse embryo implantation [33], suggesting  
368 that arachidonic acid should be released from luminal epithelium. After stromal cells were treated with  
369 arachidonic acid, the markers of fibroblast activation (TNC,  $\alpha$ SMA and SPARC) were significantly up-  
370 regulated (Fig. 4A-source data-1). Treatment with arachidonic acid also upregulated the protein levels of  
371 decidualization markers (BMP2, WNT4, E2F8 and CYCLIN D3) (Fig. 4B-source data-2) and the mRNA  
372 level of *Prl8a2* (another marker for mouse decidualization) (Fig. 4D). Under in vitro decidualization,  
373 arachidonic acid treatment also significantly increased the decidualization markers (Fig. 4C-source data-3).  
374 These results indicated that arachidonic acid might promote decidualization through fibroblast activation.  
375 Additionally, treatment with arachidonic acid distinctly stimulated the protein levels of COX-2, PGIS and  
376 PPAR- $\delta$ , but had no obvious effects on PGES (Fig. 4E-source data-4). The stimulation of arachidonic acid  
377 on PGIS and PPAR $\delta$  was abrogated by COX-2 inhibitor NS398 (Fig. 4F-source data-5). The induction of  
378 arachidonic acid on *Prl8a2* mRNA levels was also suppressed by either COX-2 inhibitor NS398 or PPAR-  
379  $\delta$  antagonist GSK0660 (Fig. 4H, 4I). Arachidonic acid also significantly induced the protein level of

380   ACTIVIN A and the mRNA level of *Inhba* (encoded for ACTIVIN A) (Fig. 4G, 4J-source data-6).  
381   Furthermore, the induction of arachidonic acid on *Prl8a2* expression was abrogated by either ACTIVIN A  
382   inhibitor (SB431542) or *Inhba* siRNA (Fig. 4K, 4L). These results suggested that arachidonic acid induced  
383   fibroblast activation and promoted decidualization through ACTIVIN A.

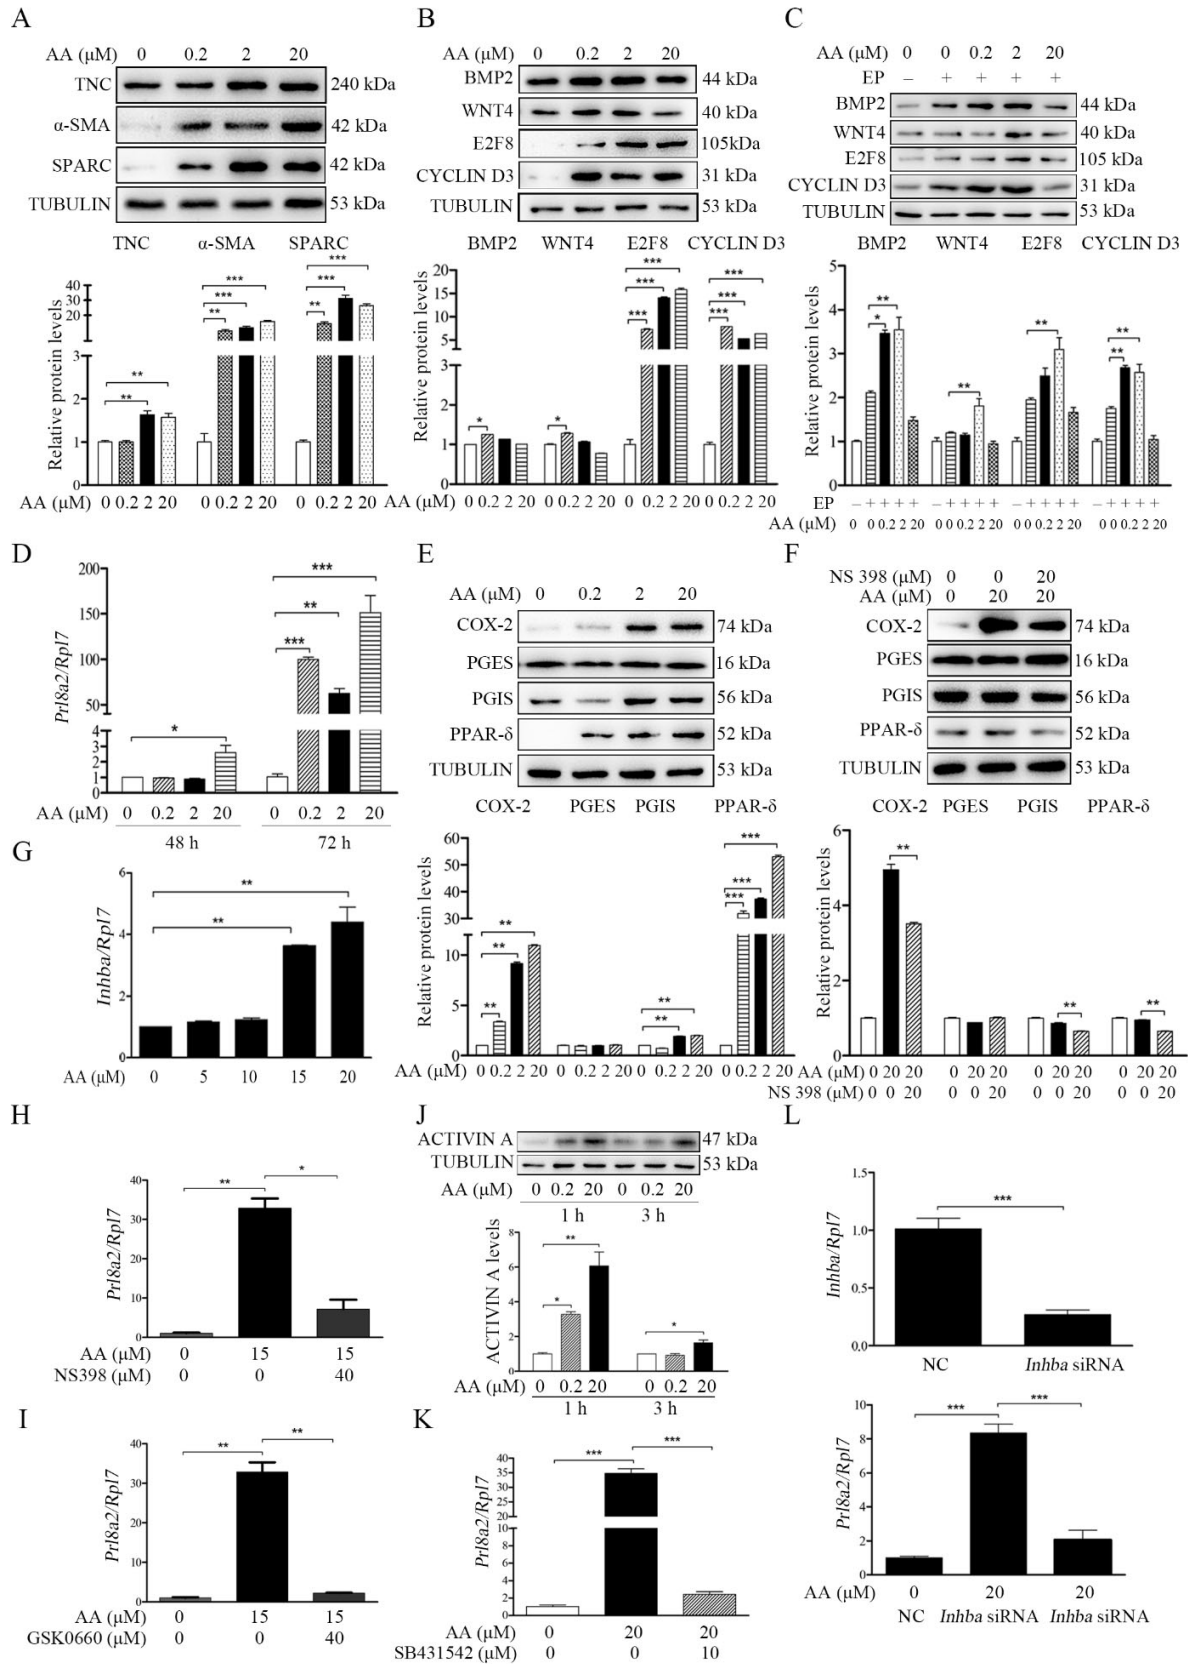

385 **Fig. 4. Effects of arachidonic acid on fibroblast activation and decidualization through PGI-PPAR $\delta$ -**  
386 **ACTIVIN A pathway.** (A) Western blot analysis on effects of arachidonic acid on markers of  
387 fibroblast activation after stromal cells were treated with arachidonic acid for 6 h. (B) Western blot  
388 analysis on effects of arachidonic acid on decidualization markers after stromal cells were treated  
389 with arachidonic acid for 48 h. (C) Western blot analysis on effects of arachidonic acid on  
390 decidualization markers after stromal cells were treated with arachidonic acid for 48 h under in vitro  
391 decidualization. EP, 17 $\beta$ -estradiol + progesterone. (D) QPCR analysis of *Prl8a2* mRNA level after  
392 stromal cells were treated with arachidonic acid for 72 h. (E) Western blot analysis on effects of  
393 arachidonic acid on COX2, PGES, PGIS and PPAR $\delta$  protein levels after stromal cells were treated  
394 with arachidonic acid for 6 h. (F) Western blot analysis on effects of NS398 (COX-2 inhibitor) on  
395 arachidonic acid induction of COX2, PGES, PGIS and PPAR $\delta$  protein levels after stromal cells were  
396 treated with arachidonic acid for 48 h in the absence or presence of NS398. (G) QPCR analysis of  
397 *Inhba* mRNA level after stromal cells were treated with arachidonic acid for 72 h. (H) QPCR  
398 analysis of on effects of NS398 on arachidonic acid induction of *Prl8a2* mRNA level after stromal  
399 cells were treated with arachidonic acid for 72h. (I) QPCR analysis of on effects of GSK0660 on  
400 arachidonic acid induction of *Prl8a2* mRNA level after stromal cells were treated with AA for 72h.  
401 (J) Western blot analysis on effects of arachidonic acid on ACTIVIN A protein level after stromal  
402 cells were treated with AA for 24 h. (K) QPCR analysis on effects of SB431542 (ACTIVIN A  
403 inhibitor) on arachidonic acid induction of *Prl8a2* mRNA levels. (L) QPCR analysis on effects of  
404 *Inhba* siRNAs on *arachidonic acid induction on Inhba* mRNA level after stromal cells were treated  
405 with arachidonic acid for 72 h. Data were presented as means  $\pm$  SD from at least 3 biological  
406 replicates.

407

### 408 **3.5. Blastocyst-derived TNF $\alpha$ promotes cPLA $_{2\alpha}$ phosphorylation and arachidonic acid secretion**

409 We just showed that arachidonic acid could initiate fibroblast activation and induce decidualization. When  
410 we examined the concentration of arachidonic acid in the uterine luminal fluid, the luminal concentration

411 of arachidonic acid at day 4 midnight was significantly higher than that in the morning of days 3 and 4 of  
412 pregnancy, indicating AA secretion from the uterus just after embryo implantation (Fig. 5A).

413

414 Immunofluorescence also showed that the p-cPLA<sub>2α</sub> level in luminal epithelium in day 4 midnight was  
415 obviously stronger than that on day 4 (Fig. 5B). Compare with inter-implantation sites, p-cPLA<sub>2α</sub>  
416 immunofluorescence at implantation site on D5 was also stronger (Fig. 5C). Compared with delayed  
417 implantation, p-cPLA<sub>2α</sub> immunofluorescence in the luminal epithelium was stronger 12 h after estrogen  
418 activation (Fig. 5D). Western blot also confirmed that p-cPLA<sub>2α</sub> levels on day 4 and day 4 midnight of  
419 pregnancy was significantly higher than day 4 and day 4 midnight of pseudopregnancy (Fig. 5E-source  
420 data-1). Compared with delayed implantation, p-cPLA<sub>2α</sub> protein levels were also higher 12 h after estrogen  
421 activation (Fig. 5F-source data-2). These results suggested that embryos should be involved in cPLA<sub>2α</sub>  
422 phosphorylation.

423

424 Furthermore, we examined the markers of fibroblast activation. Compared with delayed implantation, the  
425 immunostaining levels of both TNC and FSP1 at implantation sites after estrogen activation were stronger  
426 (Fig. 5G). Western blot also indicated that the protein levels of the markers of fibroblast activation (αSMA,  
427 TNC and SPARC) on day 4 of pregnancy were stronger than that on day 4 of pseudopregnancy (Fig. 5H-  
428 source data-3). This results strongly suggest that embryos were tightly involved in fibroblast activation.

429



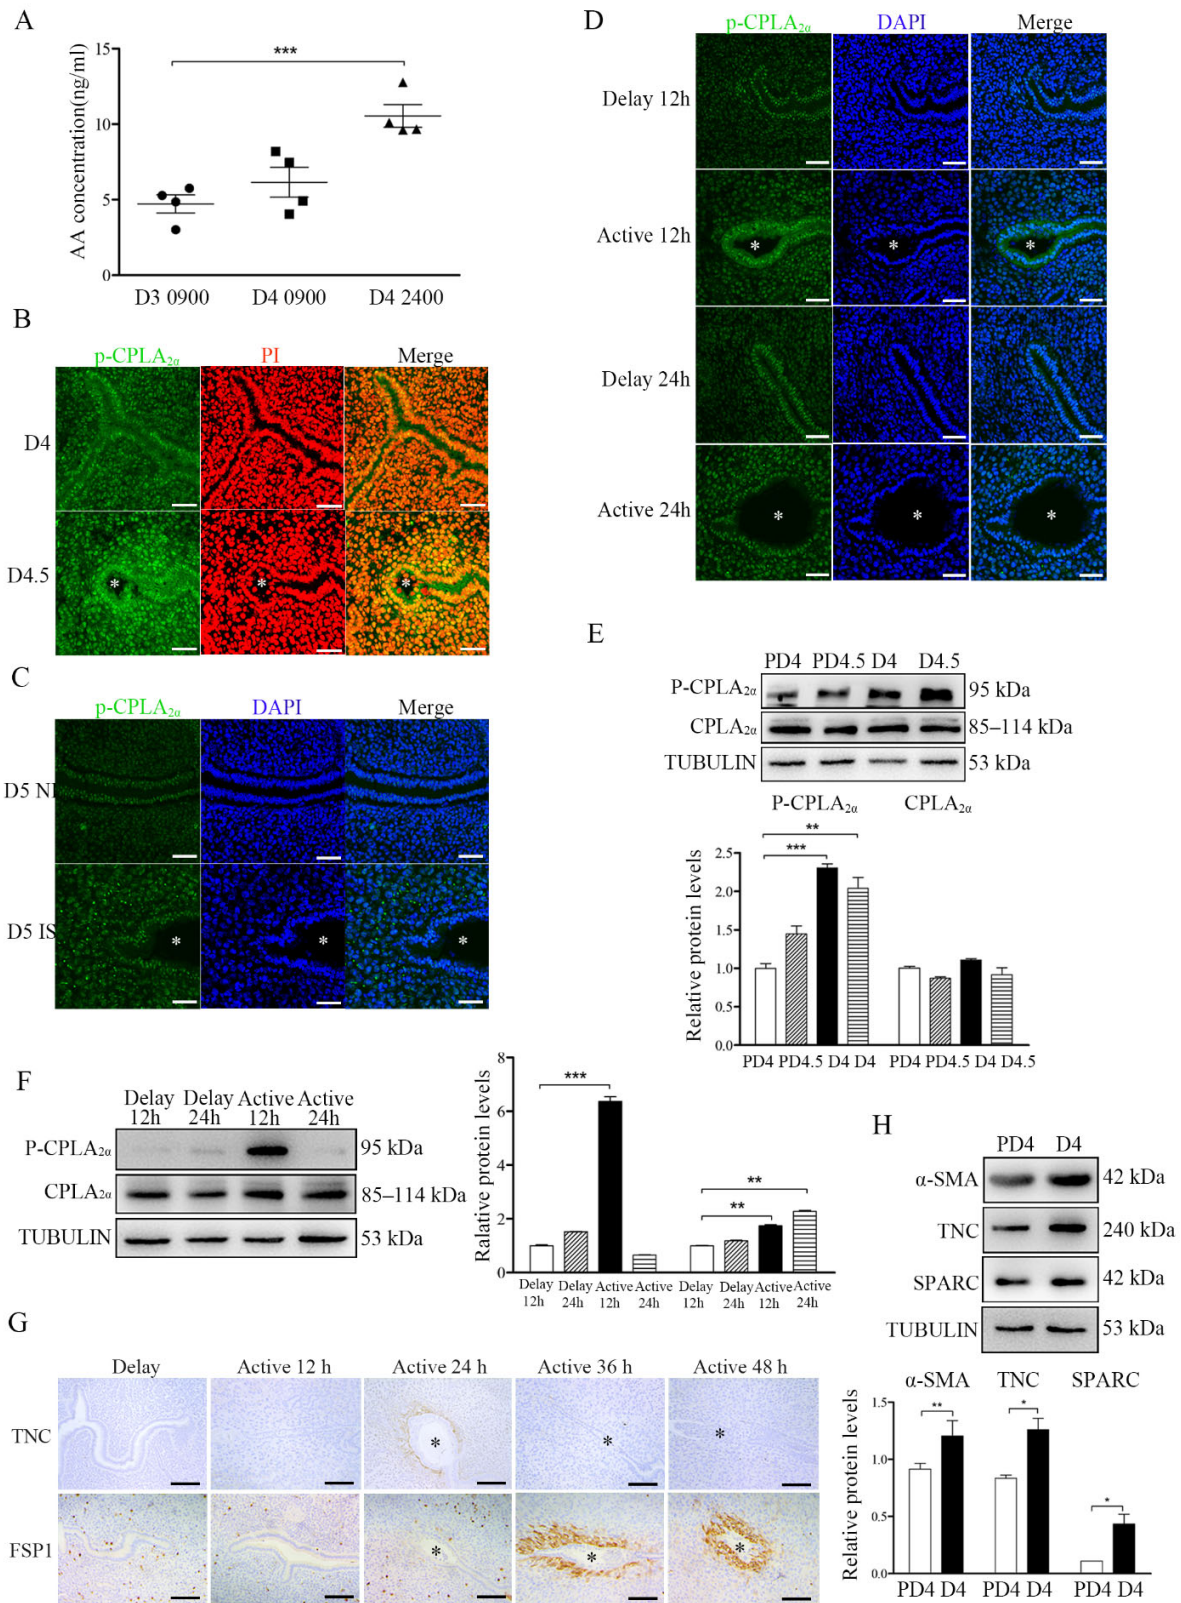

431 **Fig. 5. The involvement of blastocysts in fibroblast activation during early pregnancy.** (A) Arachidonic  
432 acid concentration in uterine luminal fluid flushed on day 3 morning (10:00; n = 20 mice), day 4  
433 morning (10:00; n=20 mice), and day 4 midnight (24:00; n = 20 mice) of pregnancy. (B) p-cPLA<sub>2α</sub>  
434 immunofluorescence in mouse uteri on day 4 morning (10:00; n = 6) and day 4 evening (24:00; n  
435 =6. \* Embryo. Scale bar =50 μm. (C) p-cPLA<sub>2α</sub> immunofluorescence in mouse uteri at implantation  
436 sites and inter-implantation sites on day 5 morning (10:00; n = 6 mice) of pregnancy. \* Embryo. NI,  
437 inter-implantation site; IS, implantation site. Scale bar =50 μm. (D) p-cPLA<sub>2α</sub> immunofluorescence  
438 of in mouse uteri 12 and 24 h after delayed implantation was activated by estrogen treatment,  
439 respectively. \* Embryo. Scale bar =50 μm. (E) Western blot analysis of cPLA<sub>2α</sub> and p-cPLA<sub>2α</sub>  
440 protein levels in mouse uteri on day 4 and day 4 midnight of pregnancy, and day 4 and day 4  
441 midnight of pseudopregnancy, respectively. (F) Western blot analysis of cPLA<sub>2α</sub> and p-cPLA<sub>2α</sub>  
442 protein levels in mouse uteri 12 and 24 h after delayed implantation was activated by estrogen  
443 treatment. (G) Immunostaining of TNC and FSP1 in mouse uteri 12, 24, 36 and 48 h after delayed  
444 implantation was activated by estrogen treatment. \* Embryo. (H) Western blot analysis α-SMA,  
445 TNC, and SPARC protein levels in mouse uteri on day 4 of pregnancy and day4 of pseudopregnancy.  
446 PD4, D4 of pseudopregnancy.

447

448 S100A9, HB-EGF and TNF $\alpha$  are previously shown to be secreted by blastocysts [50-52]. When S100A9-  
449 soaked blue beads were transferred into day 4 pseudopregnant uterine lumen, FSP1 had no obvious change,  
450 but TNC immunostaining was increased slightly (Fig. 6A). When HB-EGF-soaked beads were transferred,  
451 FSP1 immunostaining was slightly increased, but TNC immunostaining was increased obviously (Fig. 6B).  
452 However, TNF $\alpha$ -soaked beads obviously stimulated the immunostaining levels of both FSP1 and TNC (Fig.  
453 6C).

454

455 After TNF $\alpha$ -soaked beads were transferred into day 4 pseudopregnant uterine lumen, p-cPLA $_{2\alpha}$   
 456 immunofluorescence at luminal epithelium was obviously increased (Fig. 6D). When the epithelial cells  
 457 isolated day 4 pseudopregnant uterus were treated with TNF $\alpha$ , Western blot showed that the protein level  
 458 of p-cPLA $_{2\alpha}$  was significantly upregulated (Fig. 6E-source data-1). These results indicated that embryo-  
 459 derived TNF $\alpha$  was able to promote the phosphorylation of cPLA $_{2\alpha}$  in luminal epithelium for liberating  
 460 arachidonic acid into uterine stroma.  
 461

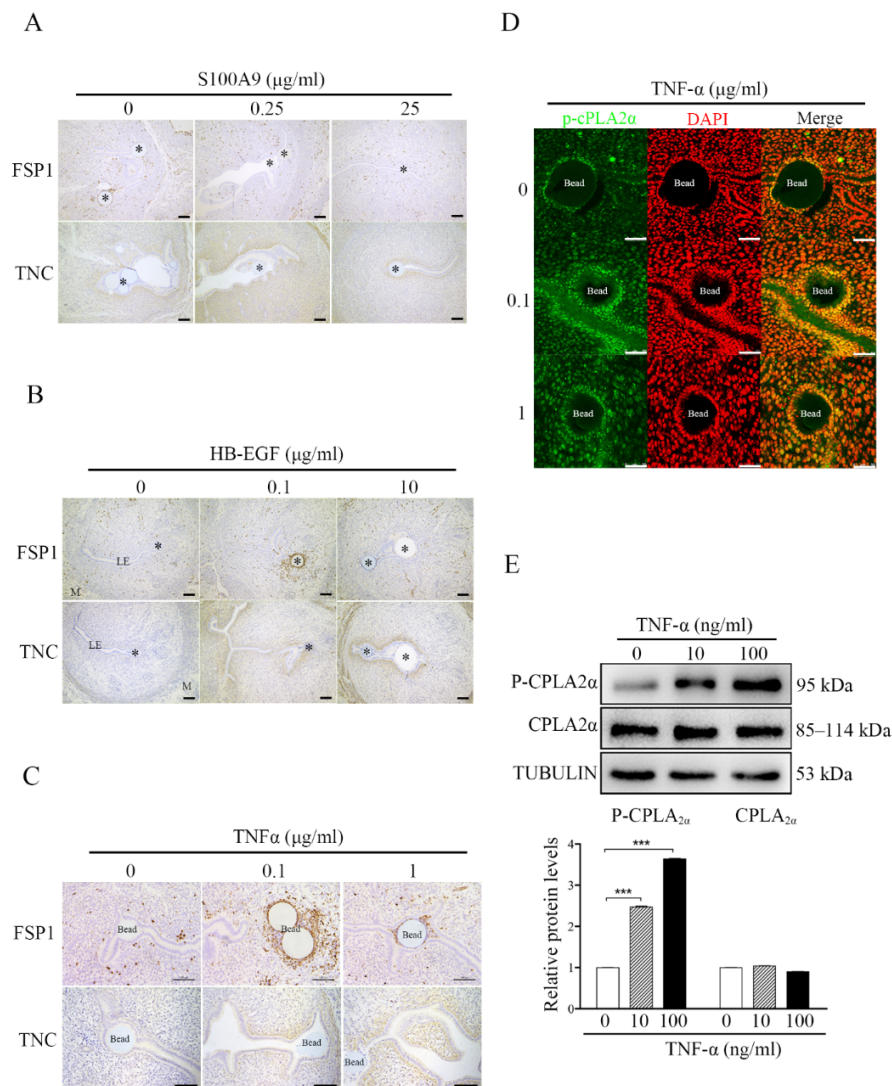

462

463 **Fig. 6. Effects of TNF $\alpha$  on cPLA $_{2\alpha}$  phosphorylation and arachidonic acid secretion. (A)**  
464 Immunostaining of TNC and FSP1 in mouse uteri after S100A9-soaked blue beads were  
465 transferred into uterine lumen of day 4 pseudopregnant mice for 24 h. **(B)** Immunostaining of TNC  
466 and FSP1 in mouse uteri after HB-EGF-soaked blue beads were transferred into uterine lumen of  
467 day 4 pseudopregnant mice for 24 h. **(C)** Immunostaining of TNC and FSP1 in mouse uteri after  
468 TNF $\alpha$ -soaked blue beads were transferred into uterine lumen of day 4 pseudopregnant mice for  
469 24 h.\* Bead; LE, luminal epithelium; M, muscular layer; St, stroma. Scale bar =100  $\mu$ m. **(D)** p-  
470 cPLA $_{2\alpha}$  immunofluorescence in mouse uteri after 0.1 and 1  $\mu$ g/ml TNF $\alpha$ -soaked blue beads were  
471 transferred into day 4 pseudopregnant uterine lumen. Scale bar =50  $\mu$ m. **(E)** Western blot analysis  
472 of cPLA $_{2\alpha}$  and p-cPLA $_{2\alpha}$  protein levels after cultured epithelial cells were treated with TNF $\alpha$  for  
473 3 h.

### 475 **3.6. Effects of fibroblast activation on TNF $\alpha$ -AA-PGI $_2$ pathway under human in vitro decidualization**

476 After we showed that fibroblast activation was involved in mouse decidualization, we wondered whether  
477 fibroblast activation participated in human decidualization. Compared with control group, the protein levels  
478 of  $\alpha$ -SMA, TNC and SPARC were significantly increased under human in vitro decidualization (Fig. 7A-  
479 source data-1). Previous studied also indicated that human blastocysts could synthesize and secrete TNF $\alpha$   
480 [50; 53]. When human uterine epithelial ISHIKAWA cells were co-cultured with human 4003 stromal cells,  
481 TNF $\alpha$  treatment significantly increased the protein level of p-cPLA $_{2\alpha}$  in epithelial ISHIKAWA cells (Fig.  
482 7B-source data-2), and the protein levels of TNC,  $\alpha$ SMA, SPARC and ACTIVIN A in 4003 stromal cells  
483 (Fig. 7C-source data-3). When human stromal cells were treated with arachidonic acid, the protein levels  
484 of TNC,  $\alpha$ SMA and SPARC were obviously stimulated (Fig. 7D-source data-4). Meanwhile, treatment  
485 with arachidonic acid also significantly upregulated the protein levels of COX-2, PGIS and PPAR $\delta$ , but  
486 had no obvious effects on PGES protein level (Fig. 7E-source data-5). After 4003 stromal cells were treated  
487 with either PGI $_2$  analogs ILOPROST or PPAR- $\delta$  agonists GW501516, the protein levels of TNC,  $\alpha$ SMA

488 and SPARC were significantly up-regulated compared with control group (Fig. 7F-source data-6, G-source  
489 data-7). These results suggested that arachidonic acid should promote fibroblast activation through PGI<sub>2</sub>-  
490 PPAR- $\delta$  pathway during human decidualization. Treatment with arachidonic acid also significantly  
491 stimulated the mRNA expression of *INHBA* (encoded for human ACTIVIN A) (Fig. 7H), which was  
492 significantly abrogated by COX-2 inhibitor NS398 (Fig. 7I). Overall, these results indicated that fibroblast  
493 activation was also involved in human decidualization in a similar mechanism as in mice.

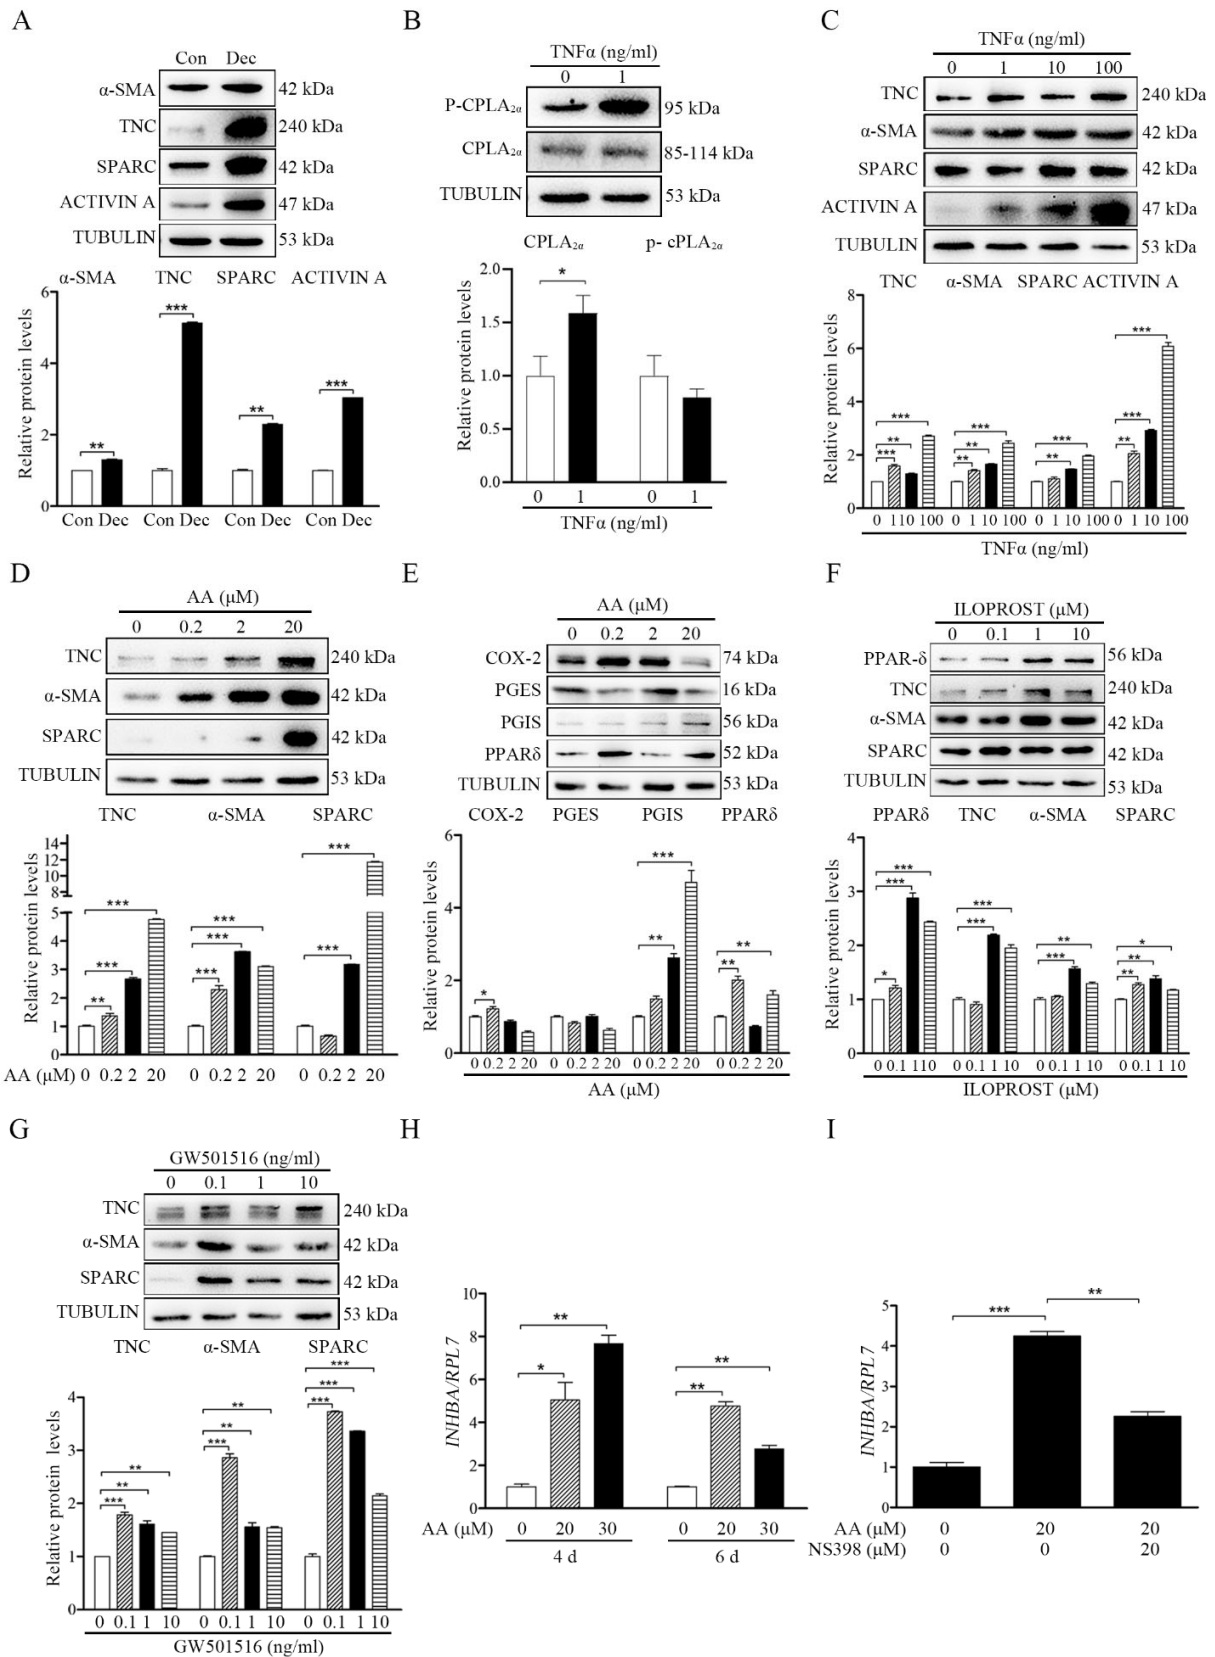

495 **Fig. 7. TNF $\alpha$  regulation of fibroblast activation through AA-PGI-ACTIVIN A pathway in human**  
496 **endometrium. (A)** Western blot analysis of  $\alpha$ -SMA, TNC, SPARC and ACTIVIN A protein levels  
497 after human stromal cells were induced for decidualization for 24 h. **(B)** Western blot analysis of  
498 cPLA<sub>2 $\alpha$</sub>  and p-cPLA<sub>2 $\alpha$</sub>  protein levels after human ISHIKAWA cells were treated with TNF $\alpha$  for 3  
499 h. **(C)** Western blot analysis of TNC,  $\alpha$ -SMA, SPARC and ACTIVIN A protein levels in stromal  
500 4003 cells after the co-culture of ISHIKAWA cells and stromal cells were treated with TNF $\alpha$  for  
501 3 h. **(D)** Western blot analysis of TNC,  $\alpha$ -SMA and SPARC protein levels after stromal 4003 cells  
502 were treated with AA for 6 h. **(E)** Western blot analysis of COX-2, PGES, PGIS, and PPAR $\delta$  protein  
503 levels after stromal 4003 cells were treated with AA for 3 h. **(F)** Western blot analysis of PPAR $\delta$ ,  
504 TNC,  $\alpha$ -SMA and SPARC protein levels after stromal 4003 cells were treated with ILOPROST for  
505 12 h. **(G)** Western blot analysis of TNC,  $\alpha$ -SMA and SPARC protein levels after stromal cells 4003  
506 cells were treated with GW501516 for 6 h. **(H)** QPCR analysis of *INHBA* mRNA levels after stromal  
507 4003 cells were treated with AA. **(I)** QPCR analysis on effects of NS398 on arachidonic acid  
508 stimulation of *INHBA* mRNA levels after stromal 4003 cells were treated with AA.

509

### 510 **3.7. Arachidonic acid-PGI<sub>2</sub> pathway is essential to human decidualization**

511 Insulin growth factor binding protein 1(*IGFBP1*) and prolactin (*PRL*) are recognized markers for human in  
512 vitro decidualization [54]. When human stromal cells were treated with arachidonic acid, both *IGFBP1* and  
513 *PRL* were significantly increased (Fig. 8A). Under human in vitro decidualization, either ILOPROST or  
514 GW501516 could significantly promote the mRNA expression of *IGFBP1* and *PRL* (Fig. 8B, C). The  
515 induction of arachidonic acid on *IGFBP1* and *PRL* mRNA expression was significantly abrogated by either  
516 COX-2 inhibitor NS398 or PPAR $\delta$  antagonist GSK0660 (Fig. 8D). Under human in vitro decidualization,  
517 the mRNA levels of *IGFBP1* and *PRL* were also significantly up-regulated by ACTIVIN A treatment (Fig.  
518 8E). Taken together, these results suggested that epithelium-derived arachidonic acid could promote

519 fibroblast activation through COX-2-PGI<sub>2</sub>-PPAR- $\delta$  pathway and induce decidualization via ACTIVIN A  
520 during human decidualization, which was also consistent with the results in mice.  
521 For translational study, we examined the markers of fibroblast activation in human samples. Compared  
522 with normal diploid group, the protein levels of SPARC, PGIS and ACTIVIN A in the decidual tissues with  
523 fetal trisomy 16 were obviously down-regulated (Fig. 8F), suggesting the abnormality of fibroblast  
524 activation in the decidua with fetal trisomy 16.



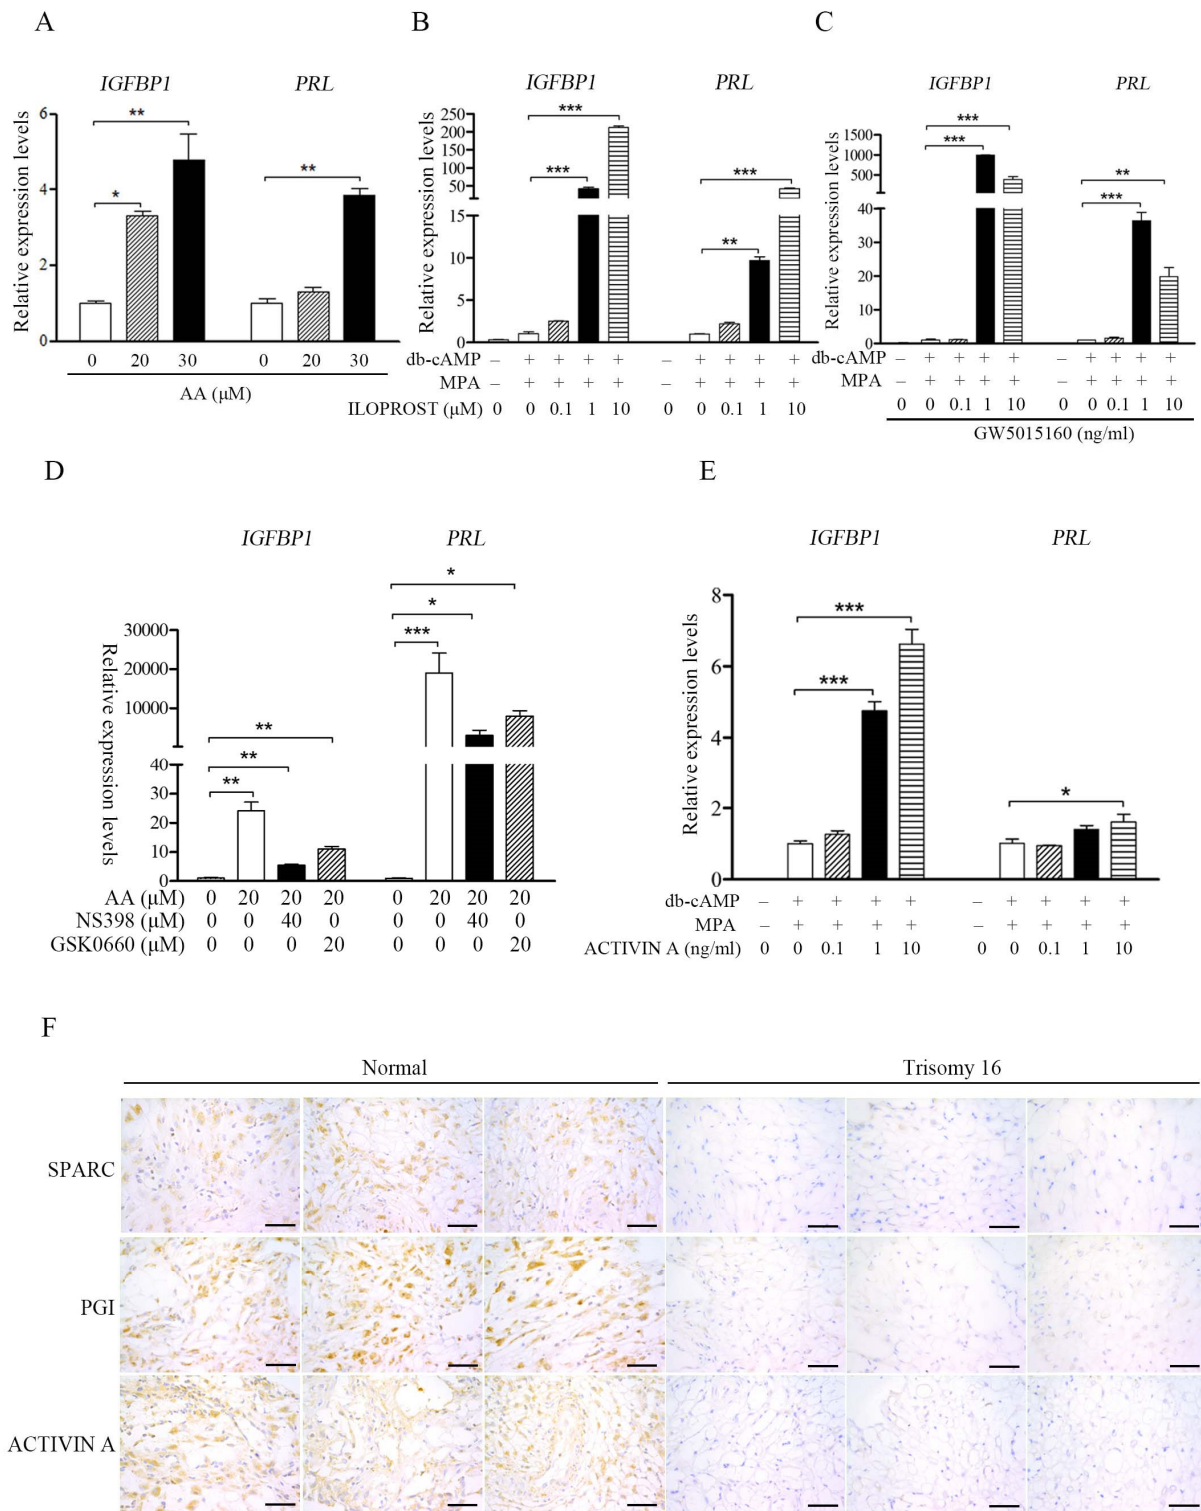

525

526 **Fig. 8. AA-PGI<sub>2</sub>-PPAR $\delta$ -ACTIVIN A regulation on human decidualization (A) QPCR analysis of**

527 *IGFBP1* and *PRL* mRNA levels after stromal 4003 cells were treated with AA. (B) QPCR analysis

528 of *IGFBP1* and *PRL* mRNA levels after stromal 4003 cells were treated with ILOPROST for 4  
529 days under in vitro decidualization for 4 days. (C) QPCR analysis of *IGFBP1* and *PRL* mRNA  
530 levels after stromal 4003 cells were treated with GW501160 for 4 days under in vitro  
531 decidualization for 4 days. (D) QPCR analysis on effects of NS398 or GSK0660 on AA induction  
532 of *IGFBP1* and *PRL* mRNA levels after stromal 4003 cells were treated with arachidonic acid for  
533 4 days. (E) QPCR analysis of *IGFBP1* and *PRL* mRNA levels after stromal 4003 cells were treated  
534 with ACTIVIN A for 2 days under in vitro decidualization. (F) Immunostaining of SPARC, PGIS  
535 and ACTIVIN A in human decidual tissues from control and decidual tissues with fetal trisomy 16.  
536 Scale bar, 50  $\mu$ m.

537

#### 538 4. DISCUSSION

539

540 Our study was the first to identify that embryo-derived TNF $\alpha$  promotes the phosphorylation of cPLA<sub>2 $\alpha$</sub>  and  
541 the release of arachidonic acid from luminal epithelium to induce fibroblast activation and decidualization  
542 through ACTIVIN A. We also showed that the pathway underlying fibroblast activation was conserved in  
543 mice and humans.

544

545 Fibroblasts activation could be identified by many markers, including  $\alpha$ -SMA, TNC, POSTN, NG-2, PDGF  
546 receptor-a/b, FSP1 (S100A4) and FAP. These fibroblast markers expressed alone or in combination and  
547 could be used to identify distinct subpopulations following fibroblast activation [42; 55; 56]. Fibroblast  
548 activation plays an important role under many physiological or pathological conditions, such as cancer,  
549 injury repair and fibrosis. However, the regulation and function of fibroblast activation during  
550 decidualization remain unknown. In our study, fibroblast activation was first identified during mouse and  
551 human decidualization using multiple markers. Fibroblasts are generally in a dormant and quiescent state  
552 in tissues, and are only activated when stimulated [4]. In a previous study, mPGES1-derived PGE<sub>2</sub> supports  
553 the early inflammatory phase of wound healing and may stimulate subsequent fibroblast activation early

554 after damage [57]. Although PGE<sub>2</sub> has been shown to be essential for mouse decidualization [48; 58], PGE<sub>2</sub>  
555 was ineffective in activating fibroblast activation. However, our study indicated that arachidonic acid from  
556 luminal epithelium was able to induce fibroblast activation via PGI<sub>2</sub>-PPAR $\delta$  pathway. Previous studies  
557 indicated that arachidonic acid could promote mouse decidualization [59; 60]. COX2-derived PGI<sub>2</sub> has  
558 been identified to be essential for mouse decidualization via PPAR $\delta$  [35]. In our study, arachidonic acid  
559 concentration in uterine lumen was significantly increased during embryo attachment. Arachidonic acid,  
560 PGI<sub>2</sub> or PPAR $\delta$  agonist was able to induce fibroblast activation.

561  
562 Activated fibroblasts play key roles in the injury response, tumorigenesis, fibrosis, and inflammation  
563 through secreting different factors in different physiological or pathological processes [61]. Myofibroblast  
564 marker  $\alpha$ -SMA has been shown to be one of the important markers of early decidualization in primates[20],  
565 and sterile inflammatory secretion of products such as ATP and uric acid after injury has been shown to  
566 stimulate fibroblast activation [28; 29] and uterine decidualization [26; 27], so we speculate that fibroblast  
567 activation is strongly correlated with decidualization. Because TNC, SPARC, FSP1 and ACTIVIN A were  
568 all identified during fibroblast activation, we examined the role of each of these markers during mouse  
569 decidualization. We found that only ACTIVIN A was able to induce mouse in vitro decidualization. The  
570 function of ACTIVIN A during human decidualization was also confirmed in our study. ACTIVIN A has  
571 been shown to be important for human decidualization [62]. ACTIVIN A, its functional receptors, and  
572 binding proteins, are abundant in human endometrium [63]. Our study indicated that AA-PGI<sub>2</sub>-PPAR- $\delta$  axis  
573 stimulated fibroblast activation and induced decidualization through ACTIVIN A.

574  
575 The adequate molecular interaction between the endometrium and the blastocyst is critical for successful  
576 implantation and decidualization [64; 65]. In our study, there was a big difference of both markers of  
577 fibroblast activation and p-cPLA2 $\alpha$  between pregnancy and pseudopregnancy, and between delayed and  
578 activated implantation, strongly suggesting the involvement of embryos in these processes. Although

579 S100A9, HB-EGF and TNF $\alpha$  are previously shown to be secreted by blastocysts [50-52], TNF $\alpha$  was the  
580 only one to stimulate both FSP1 and TNC, and to phosphorylate cPLA $_{2\alpha}$  in our study. Cytosolic  
581 phospholipase A $_{2\alpha}$  (cPLA $_{2\alpha}$ , encoded by *Pla2g4a*) is a major provider of arachidonic acid (AA). *Pla2g4a*-  
582 /-mice results in deferred implantation and deranged gestational development [33]. We also showed that  
583 arachidonic acid concentration in luminal fluid was significantly increased in day 4 evening when the  
584 embryos just implanted. TNF $\alpha$  is present in the reactivated blastocyst and human blastocyst [50; 53], and  
585 may play a critical role during embryo implantation [66]. In our study, we confirmed that TNF $\alpha$  stimulated  
586 the phosphorylation of cPLA $_{2\alpha}$  and arachidonic acid release from luminal epithelium. A proper interaction  
587 between embryos and decidualization is critical for successful pregnancy. It is shown that impaired  
588 decidualization from recurrent pregnancy loss is unable to distinguish the quality of implanting blastocysts  
589 [67].

590

591 Additionally, the quality of blastocysts is essential for uNK cells to kill senescent decidual cells [68]. There  
592 is a high incidence of chromosome aneuploidy in human gametes and embryos, which is a major cause of  
593 implantation failure and miscarriage [69]. In the trisomy 18 pregnancies, the fetal and maternal hCG values  
594 were significantly lower than in controls. However, in Turner syndrome pregnancies, both fetal and  
595 maternal values were significantly higher than in controls [70]. Indeed, we found that fibroblast activation  
596 was impaired in the decidual tissues with fetal 16 trisomy. It is interesting to note that our experimental  
597 results show that the regulatory mechanism and function of fibroblast activation are conserved in humans  
598 and mice.

599

600 Activated fibroblasts play an important role in many physiological and pathologic processes. Excessive  
601 fibroblast activation can lead to fibrosis [46; 71; 72]. Fibroblast activation may be present and balanced  
602 during normal pregnancy without ultimately leading to fibrosis or other diseases. S100A4 is  
603 hypomethylated and overexpressed in grade 3 endometrioid tumors compared with benign endometrium

604 [73]. Genetic and proteomic analysis of surgical specimens from 14 patients with uterine leiomyoma  
605 showed that TNC is significantly upregulated in patient samples [74]. Fibrosis mostly occurs in pathological  
606 conditions. Intrauterine adhesions (IUA), also known as Ashman syndrome, are caused by endometrial  
607 fibrosis as a result of injury to the uterus's basal lining, resulting in partial or total adhesions in the uterine  
608 cavity [75]. IUA can interfere with the embryo's implantation and development, resulting in decreased or  
609 even full loss of intrauterine volume, female infertility, and recurrent miscarriages [76]. The thin  
610 endometrial model exhibits a higher degree of fibrosis than normal controls, which is thought to be a crucial  
611 component in embryo implantation failure [77]. The key question is why fibrosis doesn't occur during  
612 normal early pregnancy? Both activins and inhibins are expressed in pregnant uterus [78]. In our study, *Fst*  
613 was significantly up-regulated under in vitro decidualization although ACTIVIN A was able to stimulate  
614 in vitro decidualization. FST is a secreted glycoprotein and can neutralize the profibrotic and  
615 proinflammatory actions of ACTIVINS. FST has a strong antifibrotic effect in various organs [79; 80].  
616 Furthermore, FST is shown to be critical for mouse decidualization [81]. Additionally, arachidonic acid  
617 was able to induce fibroblast activation and promote decidualization in our study. A recent study showed  
618 that 11,12-epoxyeicosatrienoic acid, a metabolite of arachidonic acid can alleviate pulmonary fibrosis [82].  
619 It is possible that a physiological level of fibroblast activation is beneficial for decidualization and the long-  
620 lasting fibroblast activation could be balanced by certain molecules, like FST or arachidonic acid metabolite.

621

## 622 **5. CONCLUSION**

623 In this study, we identified that embryos-derived TNF $\alpha$  was able to phosphorylate cPLA $_{2\alpha}$  for releasing  
624 arachidonic acid from luminal epithelium. Arachidonic acid could physiologically induce fibroblast  
625 activation and promote decidualization via PGI $_2$ -PPAR $\delta$ -ACTIVIN A axis. This regulatory mechanism was  
626 also conserved in mice and humans. Overall, this study should shed a light on the novel mechanism  
627 underlying decidualization.

628

629 **6. ABBREVIATIONS**

630 **AA:** Arachidonic acid

631 **CAFs:** Cancer-associated fibroblasts

632 **DAMPs:** Damage associated molecular patterns

633 **ECM:** Extracellular matrix

634 **FA:** Fibroblast activation

635 **IUA:** Intrauterine adhesions

636 **POSTN:** Periostin

637 **TNC:** Tenascin C

638

639 **7. DECLARATIONS**

640 **Ethics approval and consent to participate:**

641 This study was approved by The Ethics Committee of Zhejiang University School of Medicine's Obstetrics  
642 and Gynecology Hospital and the Human Research Committee of Nanjing Drum Tower Hospital,  
643 respectively. All animal protocols were approved by the Animal Care and Use Committee of South China  
644 Agricultural University.

645

646 **Consent for publication:** Not applicable.

647

648 **Availability of data and materials:** All data are available in the main text.

649

650 **Competing interests:** The authors declare that they have no competing interests

651

652 **Funding:**

653 This study was supported by the National Key Research and Development Program of China  
654 (2018YFC1004400) and National Natural Science Foundation of China (31871511 and 32171114)

655

656 **Author contributions:**

657 Design experiment: STC, ZMY

658 Experiments performed: STC, WWS, YQL, WY, LY

659 Data analysis: STC, ZSY, MYL, ZMY

660 Provide clinical samples: AXL, YLH

661 Writing – manuscript: STC, ZMY

662 Writing – review & editing: STC, ZMY, YLH

663 All authors read and approved the final manuscript.

664

665 **Acknowledgments:** Not applicable.

666

667

668 **8. REFERENCES**

- 669 [1] Yoshida, G.J., 2020. Regulation of heterogeneous cancer-associated fibroblasts: the molecular  
670 pathology of activated signaling pathways. *J Exp Clin Cancer Res* 39(1):112.
- 671 [2] Tracy, L.E., Minasian, R.A., Caterson, E.J., 2016. Extracellular Matrix and Dermal Fibroblast  
672 Function in the Healing Wound. *Adv Wound Care (New Rochelle)* 5(3):119-136.
- 673 [3] Enzerink, A., Vaheri, A., 2011. Fibroblast activation in vascular inflammation. *J Thromb Haemost*  
674 9(4):619-626.
- 675 [4] Pakshir, P., Noskovicova, N., Lodyga, M., Son, D.O., Schuster, R., Goodwin, A., et al., 2020. The  
676 myofibroblast at a glance. *J Cell Sci* 133(13).
- 677 [5] Tomasek, J.J., Gabbiani, G., Hinz, B., Chaponnier, C., Brown, R.A., 2002. Myofibroblasts and  
678 mechano-regulation of connective tissue remodelling. *Nature Reviews Molecular Cell Biology*  
679 3(5):349-363.
- 680 [6] Angelini, A., Trial, J., Ortiz-Urbina, J., Cieslik, K.A., 2020. Mechanosensing dysregulation in the  
681 fibroblast: A hallmark of the aging heart. *Ageing Res Rev* 63:101150.
- 682 [7] Nurmik, M., Ullmann, P., Rodriguez, F., Haan, S., Letellier, E., 2020. In search of definitions: Cancer-  
683 associated fibroblasts and their markers. *Int J Cancer* 146(4):895-905.
- 684 [8] Shimura, T., 2021. Roles of Fibroblasts in Microenvironment Formation Associated with Radiation-  
685 Induced Cancer. *Adv Exp Med Biol* 1329:239-251.
- 686 [9] Kuzet, S.E., Gaggioli, C., 2016. Fibroblast activation in cancer: when seed fertilizes soil. *Cell Tissue*  
687 *Res* 365(3):607-619.
- 688 [10] Martin, R.D., 2007. The evolution of human reproduction: a primatological perspective. *Am J Phys*  
689 *Anthropol Suppl* 45:59-84.
- 690 [11] Salamonsen, L.A., Hutchison, J.C., Gargett, C.E., 2021. Cyclical endometrial repair and regeneration.  
691 *Development* 148(17).
- 692 [12] Schuster, R., Rockel, J.S., Kapoor, M., Hinz, B., 2021. The inflammatory speech of fibroblasts.  
693 *Immunol Rev* 302(1):126-146.
- 694 [13] Wang, W., Vilella, F., Alama, P., Moreno, I., Mignardi, M., Isakova, A., et al., 2020. Single-cell  
695 transcriptomic atlas of the human endometrium during the menstrual cycle. *Nat Med* 26(10):1644-  
696 1653.
- 697 [14] Lv, H., Zhao, G., Jiang, P., Wang, H., Wang, Z., Yao, S., et al., 2022. Deciphering the endometrial  
698 niche of human thin endometrium at single-cell resolution. *Proc Natl Acad Sci U S A* 119(8).
- 699 [15] Wang, H., Dey, S.K., 2006. Roadmap to embryo implantation: clues from mouse models. *Nat Rev*  
700 *Genet* 7(3):185-199.



- 701 [16] Li, Y., Sun, X., Dey, S.K., 2015. Entosis allows timely elimination of the luminal epithelial barrier for  
702 embryo implantation. *Cell Rep* 11(3):358-365.
- 703 [17] Gellersen, B., Brosens, J.J., 2014. Cyclic decidualization of the human endometrium in reproductive  
704 health and failure. *Endocr Rev* 35(6):851-905.
- 705 [18] Tan, Y., Li, M., Cox, S., Davis, M.K., Tawfik, O., Paria, B.C., et al., 2004. HB-EGF directs stromal  
706 cell polyploidy and decidualization via cyclin D3 during implantation. *Dev Biol* 265(1):181-195.
- 707 [19] McConaha, M.E., Eckstrum, K., An, J., Steinle, J.J., Bany, B.M., 2011. Microarray assessment of the  
708 influence of the conceptus on gene expression in the mouse uterus during decidualization.  
709 *Reproduction* 141(4):511-527.
- 710 [20] Kim, J.J., Jaffe, R.C., Fazleabas, A.T., 1999. Blastocyst invasion and the stromal response in primates.  
711 *Hum Reprod* 14 Suppl 2:45-55.
- 712 [21] Venuto, L., Lindsay, L.A., Murphy, C.R., 2008. Moesin is involved in the cytoskeletal remodelling of  
713 rat decidual cells. *Acta Histochem* 110(6):491-496.
- 714 [22] Fazleabas, A.T., Donnelly, K.M., Srinivasan, S., Fortman, J.D., Miller, J.B., 1999. Modulation of the  
715 baboon (*Papio anubis*) uterine endometrium by chorionic gonadotrophin during the period of uterine  
716 receptivity. *Proc Natl Acad Sci U S A* 96(5):2543-2548.
- 717 [23] Fujigaki, Y., Muranaka, Y., Sun, D., Goto, T., Zhou, H., Sakakima, M., et al., 2005. Transient  
718 myofibroblast differentiation of interstitial fibroblastic cells relevant to tubular dilatation in uranyl  
719 acetate-induced acute renal failure in rats. *Virchows Arch* 446(2):164-176.
- 720 [24] Chen, G.Y., Nuñez, G., 2010. Sterile inflammation: sensing and reacting to damage. *Nat Rev Immunol*  
721 10(12):826-837.
- 722 [25] Venugopal, H., Hanna, A., Humeres, C., Frangogiannis, N.G., 2022. Properties and Functions of  
723 Fibroblasts and Myofibroblasts in Myocardial Infarction. *Cells* 11(9).
- 724 [26] Gu, X.W., Chen, Z.C., Yang, Z.S., Yang, Y., Yan, Y.P., Liu, Y.F., et al., 2020. Blastocyst-induced  
725 ATP release from luminal epithelial cells initiates decidualization through the P2Y2 receptor in mice.  
726 *Sci Signal* 13(646).
- 727 [27] Zhu, Y.Y., Wu, Y., Chen, S.T., Kang, J.W., Pan, J.M., Liu, X.Z., et al., 2021. In situ Synthesized  
728 Monosodium Urate Crystal Enhances Endometrium Decidualization via Sterile Inflammation During  
729 Pregnancy. *Front Cell Dev Biol* 9:702590.
- 730 [28] Dolmatova, E., Spagnol, G., Boassa, D., Baum, J.R., Keith, K., Ambrosi, C., et al., 2012.  
731 Cardiomyocyte ATP release through pannexin 1 aids in early fibroblast activation. *Am J Physiol Heart*  
732 *Circ Physiol* 303(10):H1208-1218.
- 733 [29] Bao, J., Shi, Y., Tao, M., Liu, N., Zhuang, S., Yuan, W., 2018. Pharmacological inhibition of  
734 autophagy by 3-MA attenuates hyperuricemic nephropathy. *Clin Sci (Lond)* 132(21):2299-2322.

- 735 [30] Baiocchini, A., Montaldo, C., Conigliaro, A., Grimaldi, A., Correani, V., Mura, F., et al., 2016.  
736 Extracellular Matrix Molecular Remodeling in Human Liver Fibrosis Evolution. *PLoS One*  
737 11(3):e0151736.
- 738 [31] Yu, D., Wong, Y.M., Cheong, Y., Xia, E., Li, T.C., 2008. Asherman syndrome--one century later.  
739 *Fertil Steril* 89(4):759-779.
- 740 [32] Bazoobandi, S., Tanideh, N., Rahmanifar, F., Zare, S., Koohi-Hosseiniabadi, O., Razeghian-Jahromi,  
741 I., et al., 2020. Preventive Effects of Intrauterine Injection of Bone Marrow-Derived Mesenchymal  
742 Stromal Cell-Conditioned Media on Uterine Fibrosis Immediately after Endometrial Curettage in  
743 Rabbit. *Stem Cells Int* 2020:8849537.
- 744 [33] Song, H., Lim, H., Paria, B.C., Matsumoto, H., Swift, L.L., Morrow, J., et al., 2002. Cytosolic  
745 phospholipase A2alpha is crucial [correction of A2alpha deficiency is crucial] for 'on-time' embryo  
746 implantation that directs subsequent development. *Development* 129(12):2879-2889.
- 747 [34] Lim, H., Dey, S.K., 1997. Prostaglandin E2 receptor subtype EP2 gene expression in the mouse uterus  
748 coincides with differentiation of the luminal epithelium for implantation. *Endocrinology*  
749 138(11):4599-4606.
- 750 [35] Lim, H., Gupta, R.A., Ma, W.G., Paria, B.C., Moller, D.E., Morrow, J.D., et al., 1999. Cyclo-  
751 oxygenase-2-derived prostacyclin mediates embryo implantation in the mouse via PPARdelta. *Genes*  
752 *Dev* 13(12):1561-1574.
- 753 [36] Wang, H., Xie, H., Sun, X., Tranguch, S., Zhang, H., Jia, X., et al., 2007. Stage-specific integration of  
754 maternal and embryonic peroxisome proliferator-activated receptor delta signaling is critical to  
755 pregnancy success. *J Biol Chem* 282(52):37770-37782.
- 756 [37] Li, S.Y., Song, Z., Yan, Y.P., Li, B., Song, M.J., Liu, Y.F., et al., 2020. Aldosterone from endometrial  
757 glands is benefit for human decidualization. *Cell Death Dis* 11(8):679.
- 758 [38] Zheng, H.T., Zhang, H.Y., Chen, S.T., Li, M.Y., Fu, T., Yang, Z.M., 2020. The detrimental effects of  
759 stress-induced glucocorticoid exposure on mouse uterine receptivity and decidualization. *FASEB J*  
760 34(11):14200-14216.
- 761 [39] Fu, T., Zheng, H.T., Zhang, H.Y., Chen, Z.C., Li, B., Yang, Z.M., 2019. Oncostatin M expression in  
762 the mouse uterus during early pregnancy promotes embryo implantation and decidualization. *FEBS*  
763 *Lett* 593(15):2040-2050.
- 764 [40] Nallasamy, S., Li, Q., Bagchi, M.K., Bagchi, I.C., 2012. Msx homeobox genes critically regulate  
765 embryo implantation by controlling paracrine signaling between uterine stroma and epithelium. *PLoS*  
766 *Genet* 8(2):e1002500.

- 767 [41] Liang, X.H., Deng, W.B., Li, M., Zhao, Z.A., Wang, T.S., Feng, X.H., et al., 2014. Egr1 protein acts  
768 downstream of estrogen-leukemia inhibitory factor (LIF)-STAT3 pathway and plays a role during  
769 implantation through targeting Wnt4. *J Biol Chem* 289(34):23534-23545.
- 770 [42] Prime, S.S., Cirillo, N., Hassona, Y., Lambert, D.W., Paterson, I.C., Mellone, M., et al., 2017.  
771 Fibroblast activation and senescence in oral cancer. *J Oral Pathol Med* 46(2):82-88.
- 772 [43] Lee, K.Y., Jeong, J.W., Wang, J., Ma, L., Martin, J.F., Tsai, S.Y., et al., 2007. Bmp2 is critical for the  
773 murine uterine decidual response. *Mol Cell Biol* 27(15):5468-5478.
- 774 [44] Li, Q., Kannan, A., Wang, W., Demayo, F.J., Taylor, R.N., Bagchi, M.K., et al., 2007. Bone  
775 morphogenetic protein 2 functions via a conserved signaling pathway involving Wnt4 to regulate  
776 uterine decidualization in the mouse and the human. *J Biol Chem* 282(43):31725-31732.
- 777 [45] Qi, Q.R., Zhao, X.Y., Zuo, R.J., Wang, T.S., Gu, X.W., Liu, J.L., et al., 2015. Involvement of atypical  
778 transcription factor E2F8 in the polyploidization during mouse and human decidualization. *Cell Cycle*  
779 14(12):1842-1858.
- 780 [46] Truffi, M., Sorrentino, L., Corsi, F., 2020. Fibroblasts in the Tumor Microenvironment. *Adv Exp Med*  
781 *Biol* 1234:15-29.
- 782 [47] Loomans, H.A., Andl, C.D., 2014. Intertwining of Activin A and TGF $\beta$  Signaling: Dual Roles in  
783 Cancer Progression and Cancer Cell Invasion. *Cancers (Basel)* 7(1):70-91.
- 784 [48] Holmes, P.V., Gordashko, B.J., 1980. Evidence of prostaglandin involvement in blastocyst  
785 implantation. *J Embryol Exp Morphol* 55:109-122.
- 786 [49] Simmons, D.L., Botting, R.M., Hla, T., 2004. Cyclooxygenase isozymes: the biology of prostaglandin  
787 synthesis and inhibition. *Pharmacol Rev* 56(3):387-437.
- 788 [50] He, B., Zhang, H., Wang, J., Liu, M., Sun, Y., Guo, C., et al., 2019. Blastocyst activation engenders  
789 transcriptome reprogram affecting X-chromosome reactivation and inflammatory trigger of  
790 implantation. *Proc Natl Acad Sci U S A* 116(33):16621-16630.
- 791 [51] Haller, M., Yin, Y., Ma, L., 2019. Development and utilization of human decidualization reporter cell  
792 line uncovers new modulators of female fertility. *Proc Natl Acad Sci U S A* 116(39):19541-19551.
- 793 [52] Hamatani, T., Daikoku, T., Wang, H., Matsumoto, H., Carter, M.G., Ko, M.S., et al., 2004. Global  
794 gene expression analysis identifies molecular pathways distinguishing blastocyst dormancy and  
795 activation. *Proc Natl Acad Sci U S A* 101(28):10326-10331.
- 796 [53] Lv, J., Shan, X., Yang, H., Wen, Y., Zhang, X., Chen, H., et al., 2022. Single Cell Proteomics Profiling  
797 Reveals That Embryo-Secreted TNF- $\alpha$  Plays a Critical Role During Embryo Implantation to the  
798 Endometrium. *Reprod Sci* 29(5):1608-1617.

- 799 [54] Saleh, L., Otti, G.R., Fiala, C., Pollheimer, J., Knöfler, M., 2011. Evaluation of human first trimester  
800 decidual and telomerase-transformed endometrial stromal cells as model systems of in vitro  
801 decidualization. *Reprod Biol Endocrinol* 9:155.
- 802 [55] Grinnell, F., 1994. Fibroblasts, myofibroblasts, and wound contraction. *J Cell Biol* 124(4):401-404.
- 803 [56] Oliver, C., Montes, M.J., Galindo, J.A., Ruiz, C., Olivares, E.G., 1999. Human decidual stromal cells  
804 express alpha-smooth muscle actin and show ultrastructural similarities with myofibroblasts. *Hum*  
805 *Reprod* 14(6):1599-1605.
- 806 [57] Stratton, R., Shiwen, X., 2010. Role of prostaglandins in fibroblast activation and fibrosis. *J Cell*  
807 *Commun Signal* 4(2):75-77.
- 808 [58] Baskar, J.F., Torchiana, D.F., Biggers, J.D., Corey, E.J., Andersen, N.H., Subramanian, N., 1981.  
809 Inhibition of hatching of mouse blastocysts in vitro by various prostaglandin antagonists. *J Reprod*  
810 *Fertil* 63(2):359-363.
- 811 [59] Tessier-Prigent, A., Willems, R., Lagarde, M., Garrone, R., Cohen, H., 1999. Arachidonic acid induces  
812 differentiation of uterine stromal to decidual cells. *European Journal of Cell Biology* 78(6):398-406.
- 813 [60] Handwerger, S., Barry, S., Barrett, J., Markoff, E., Zeitler, P., Cwikel, B., et al., 1981. Inhibition of  
814 the synthesis and secretion of decidual prolactin by arachidonic acid. *Endocrinology* 109(6):2016-  
815 2021.
- 816 [61] Avery, D., Govindaraju, P., Jacob, M., Todd, L., Monslow, J., Pure, E., 2018. Extracellular matrix  
817 directs phenotypic heterogeneity of activated fibroblasts. *Matrix Biol* 67:90-106.
- 818 [62] Zhao, H.J., Chang, H.M., Zhu, H., Klausen, C., Li, Y., Leung, P.C.K., 2018. Bone Morphogenetic  
819 Protein 2 Promotes Human Trophoblast Cell Invasion by Inducing Activin A Production.  
820 *Endocrinology* 159(7):2815-2825.
- 821 [63] He, Z.Y., Liu, H.C., Mele, C.A., Barmat, L., Veeck, L.L., Davis, O., et al., 1999. Expression of  
822 inhibin/activin subunits and their receptors and binding proteins in human preimplantation embryos.  
823 *J Assist Reprod Genet* 16(2):73-80.
- 824 [64] Massimiani, M., Lacconi, V., La Civita, F., Ticconi, C., Rago, R., Campagnolo, L., 2019. Molecular  
825 Signaling Regulating Endometrium-Blastocyst Crosstalk. *Int J Mol Sci* 21(1).
- 826 [65] Latifi, Z., Fattahi, A., Ranjbaran, A., Nejabati, H.R., Imakawa, K., 2018. Potential roles of  
827 metalloproteinases of endometrium-derived exosomes in embryo-maternal crosstalk during  
828 implantation. *J Cell Physiol* 233(6):4530-4545.
- 829 [66] You, Y., Stelzl, P., Joseph, D.N., Aldo, P.B., Maxwell, A.J., Dekel, N., et al., 2021. TNF- $\alpha$  Regulated  
830 Endometrial Stroma Secretome Promotes Trophoblast Invasion. *Front Immunol* 12:737401.

- 831 [67] Salker, M., Teklenburg, G., Molokhia, M., Lavery, S., Trew, G., Aojanepong, T., et al., 2010. Natural  
832 selection of human embryos: impaired decidualization of endometrium disables embryo-maternal  
833 interactions and causes recurrent pregnancy loss. *PLoS One* 5(4):e10287.
- 834 [68] Kong, C.S., Ordoñez, A.A., Turner, S., Tremaine, T., Muter, J., Lucas, E.S., et al., 2021. Embryo  
835 biosensing by uterine natural killer cells determines endometrial fate decisions at implantation.  
836 *FASEB J* 35(4):e21336.
- 837 [69] Kimelman, D., Pavone, M.E., 2021. Non-invasive prenatal testing in the context of IVF and PGT-A.  
838 *Best Pract Res Clin Obstet Gynaecol* 70:51-62.
- 839 [70] Abbas, A., Chard, T., Nicolaidis, K., 1995. Fetal and maternal hCG concentration in aneuploid  
840 pregnancies. *Br J Obstet Gynaecol* 102(7):561-563.
- 841 [71] Giusti, I., Di Francesco, M., Poppa, G., Esposito, L., D'Ascenzo, S., Dolo, V., 2022. Tumor-Derived  
842 Extracellular Vesicles Activate Normal Human Fibroblasts to a Cancer-Associated Fibroblast-Like  
843 Phenotype, Sustaining a Pro-Tumorigenic Microenvironment. *Front Oncol* 12:839880.
- 844 [72] Yeo, S.Y., Lee, K.W., Shin, D., An, S., Cho, K.H., Kim, S.H., 2018. A positive feedback loop bi-  
845 stably activates fibroblasts. *Nat Commun* 9(1):3016.
- 846 [73] Xie, R., Loose, D.S., Shipley, G.L., Xie, S., Bassett, R.L., Jr., Broaddus, R.R., 2007. Hypomethylation-  
847 induced expression of S100A4 in endometrial carcinoma. *Mod Pathol* 20(10):1045-1054.
- 848 [74] Jamaluddin, M.F.B., Nagendra, P.B., Nahar, P., Oldmeadow, C., Tanwar, P.S., 2019. Proteomic  
849 Analysis Identifies Tenascin-C Expression Is Upregulated in Uterine Fibroids. *Reprod Sci* 26(4):476-  
850 486.
- 851 [75] Healy, M.W., Schexnayder, B., Connell, M.T., Terry, N., DeCherney, A.H., Csokmay, J.M., et al.,  
852 2016. Intrauterine adhesion prevention after hysteroscopy: a systematic review and meta-analysis. *Am*  
853 *J Obstet Gynecol* 215(3):267-275.e267.
- 854 [76] Leung, R.K., Lin, Y., Liu, Y., 2021. Recent Advances in Understandings Towards Pathogenesis and  
855 Treatment for Intrauterine Adhesion and Disruptive Insights from Single-Cell Analysis. *Reprod Sci*  
856 28(7):1812-1826.
- 857 [77] Zhang, L., Li, Y., Dong, Y.C., Guan, C.Y., Tian, S., Lv, X.D., et al., 2022. Transplantation of umbilical  
858 cord-derived mesenchymal stem cells promotes the recovery of thin endometrium in rats. *Sci Rep*  
859 12(1):412.
- 860 [78] Ni, N., Li, Q., 2017. TGF $\beta$  superfamily signaling and uterine decidualization. *Reprod Biol Endocrinol*  
861 15(1):84.
- 862 [79] Aoki, F., Kurabayashi, M., Hasegawa, Y., Kojima, I., 2005. Attenuation of bleomycin-induced  
863 pulmonary fibrosis by follistatin. *Am J Respir Crit Care Med* 172(6):713-720.

- 864 [80] Patella, S., Phillips, D.J., Tchongue, J., de Kretser, D.M., Sievert, W., 2006. Follistatin attenuates early  
865 liver fibrosis: effects on hepatic stellate cell activation and hepatocyte apoptosis. *Am J Physiol*  
866 *Gastrointest Liver Physiol* 290(1):G137-144.
- 867 [81] Fullerton, P.T., Jr., Monsivais, D., Kommagani, R., Matzuk, M.M., 2017. Follistatin is critical for  
868 mouse uterine receptivity and decidualization. *Proc Natl Acad Sci U S A* 114(24):E4772-e4781.
- 869 [82] Kim, H.S., Moon, S.J., Lee, S.E., Hwang, G.W., Yoo, H.J., Song, J.W., 2021. The arachidonic acid  
870 metabolite 11,12-epoxyeicosatrienoic acid alleviates pulmonary fibrosis. *Exp Mol Med* 53(5):864-874.

871

872 **Table 1. Primers and siRNA sequences used in this study.**

873

| Gene                    | Species | Sequence (5'-3')                                    | Application | Accession Number | Product size |
|-------------------------|---------|-----------------------------------------------------|-------------|------------------|--------------|
| <i>Rpl7</i>             | Mouse   | GCAGATGTACCGCACTGAGATTC<br>ACCTTTGGGCTTACTCCATTGATA | RT-qPCR     | NM_011291.5      | 129 bp       |
| <i>Prl8a2</i>           | Mouse   | AGCCAGAAATCACTGCCACT<br>TGATCCATGCACCCATAAAA        | RT-qPCR     | NM_010088        | 119 bp       |
| <i>Inaba</i>            | Mouse   | CCAGTCTAGTGCTTCTGGGC<br>GATGAGGGTGGTCTTCGGAC        | RT-qPCR     | NM_008380.2      | 156 bp       |
| <i>RPL7</i>             | Human   | CTGCTGTGCCAGAAACCCTT<br>TCTTGCCATCCTCGCCAT          | RT-qPCR     | NM_000971        | 194 bp       |
| <i>IGFBP1</i>           | Human   | CCAAACTGCAACAAGAATG<br>GTAGACGCACCAGCAGAG           | RT-qPCR     | NM_001013029     | 87 bp        |
| <i>PRL</i>              | Human   | AAGCTGTAGAGATTGAGGAGCAAA<br>TCAGGATGAACCTGGCTGACTA  | RT-qPCR     | NM_000948        | 76 bp        |
| <i>INHBA</i>            | Human   | TCATCACGTTTGCCGAGTCA<br>TGTTGGCCTTGGGGACTTTT        | RT-qPCR     | NM_002192        | 129 bp       |
| <i>Negative control</i> | Mouse   | CTCCGAACGTGTCACGT                                   | siRNA       |                  |              |
| <i>Activin a</i>        | Mouse   | GAACAGTCACATAGACCTT                                 | siRNA       |                  |              |

874

875

876

877

878 Legends for uncropped Western blot images

879

880 Fig. 1B-source data-1. Western blot analysis of  $\alpha$ -SMA, SPARC, TNC protein level under in vitro  
881 decidualization (EP) for 24 h.

882

883 Fig. 2A-source data-1. Western blot analysis on the effects of TNC on decidualization markers (BMP2,  
884 WNT4, E2F8 and CYCLIN D3) after stromal cells were treatment with TNC for 72 h.

885

886 Fig. 2B-source data-2. Western blot analysis of the effects of FSP1 on decidualization markers after  
887 stromal cells were treated with FSP1 for 72 h.

888

889 Fig. 2C-source data-3. Western blot analysis on the effects of Sparc overexpression on decidualization  
890 markers after overexpression of Sparc gene in cultured stromal cells.

891

892 Fig. 2D-source data-4. Western blot analysis on ACTIVIN A protein levels in mouse uteri on day 4 0900  
893 and day 4 2400 of pregnancy and pseudopregnancy, respectively.

894

895 Fig. 2E-source data-5. Western blot analysis on the effects of ACTIVIN A on decidualization markers  
896 after stromal cells were treated with ACTIVIN A for 72 h.

897

898 Fig. 2F-source data-6. Western blot analysis on the effects of ACTIVIN A on decidualization markers  
899 after stromal cells were treated with ACTIVIN A for 48 h under in vitro decidualization.

900

901 Fig. 3A-source data-1. The effects of PGE2 on markers of fibroblast activation.

902



903 Fig. 3B-source data-2. The effects of ILOPROST, PGI2 analog, on markers of fibroblast activation after  
904 stromal cells was treated with PGI2 for 12 h.

905

906 Fig. 3C-source data-3. The effects of GW501516, PPAR $\delta$  agonist, on markers of fibroblast activation.

907

908 Fig. 3D-source data-4. The effects of ILOPROST on decidualization markers.

909

910 Fig. 3E-source data-5. The effects of GW501516 on decidualization markers.

911

912 Fig. 3F-source data-6. The effects of ILOPROST on ACTIVIN A protein levels after stromal cells were  
913 treated with ILOPROST for 24 h.

914

915 Fig. 4A-source data-1. Western blot analysis on effects of arachidonic acid on markers of fibroblast  
916 activation after stromal cells were treated with arachidonic acid for 6 h.

917

918 Fig. 4B-source data-2. Western blot analysis on effects of arachidonic acid on decidualization markers  
919 after stromal cells were treated with arachidonic acid for 48 h.

920

921 Fig. 4C-source data-3. Western blot analysis on effects of arachidonic acid on decidualization markers  
922 after stromal cells were treated with arachidonic acid for 48 h under in vitro decidualization. EP, 17 $\beta$ -  
923 estradiol + progesterone.

924

925 Fig. 4E-source data-4. Western blot analysis on effects of arachidonic acid on COX2, PGES, PGIS and  
926 PPAR $\delta$  protein levels after stromal cells were treated with arachidonic acid for 6 h.

927

928 Fig. 4F-source data-5. Western blot analysis on effects of NS398 (COX-2 inhibitor) on arachidonic acid  
929 induction of COX2, PGES, PGIS and PPAR $\delta$  protein levels after stromal cells were treated with  
930 arachidonic acid for 48 h in the absence or presence of NS398.

931

932 Fig. 4J-source data-6. Western blot analysis on effects of arachidonic acid on ACTIVIN A protein level  
933 after stromal cells were treated with AA for 24 h.

934

935 Fig. 5E-source data-1. Western blot analysis of cPLA2 $\alpha$  and p-cPLA2 $\alpha$  protein levels in mouse uteri on  
936 day 4 and day 4 midnight of pregnancy, and day 4 and day 4 midnight of pseudopregnancy, respectively.

937

938 Fig. 5F-source data-2. Western blot analysis of cPLA2 $\alpha$  and p-cPLA2 $\alpha$  protein levels in mouse uteri 12  
939 and 24 h after delayed implantation was activated by estrogen treatment.

940

941 Fig. 5H-source data-3. Western blot analysis  $\alpha$ -SMA, TNC, and SPARC protein levels in mouse uteri on  
942 day 4 of pregnancy and day4 of pseudopregnancy.

943

944 Fig. 6E-source data-1. Western blot analysis of cPLA2 $\alpha$  and p-cPLA2 $\alpha$  protein levels after cultured  
945 epithelial cells were treated with TNF $\alpha$  for 3 h.

946

947 Fig. 7A-source data-1. Western blot analysis of  $\alpha$ -SMA, TNC, SPARC and ACTIVIN A protein levels  
948 after human stromal cells were induced for decidualization for 24 h.

949

950 Fig. 7B-source data-2. Western blot analysis of cPLA2 $\alpha$  and p-cPLA2 $\alpha$  protein levels after human  
951 ISHIKAWA cells were treated with TNF $\alpha$  for 3 h.

952

953 Fig. 7C-source data-3. Western blot analysis of TNC,  $\alpha$ -SMA, SPARC and ACTIVIN A protein levels in  
954 stromal 4003 cells after the co-culture of ISHIKAWA cells and stromal cells were treated with TNF $\alpha$  for  
955 3 h.

956

957 Fig. 7D-source data-4. Western blot analysis of TNC,  $\alpha$ -SMA and SPARC protein levels after stromal  
958 4003 cells were treated with AA for 6 h.

959

960 Fig. 7E-source data-5. Western blot analysis of COX-2, PGES, PGIS, and PPAR $\delta$  protein levels after  
961 stromal 4003 cells were treated with AA for 3 h.

962

963 Fig. 7F-source data-6. Western blot analysis of PPAR $\delta$ , TNC,  $\alpha$ -SMA and SPARC protein levels after  
964 stromal 4003 cells were treated with ILOPROST for 12 h.

965

966 Fig. 7G-source data-7. Western blot analysis of TNC,  $\alpha$ -SMA and SPARC protein levels after stromal  
967 cells 4003 cells were treated with GW501516 for 6 h.

968
